# Supplementary material for: What do we talk about, when we talk about single-crystal termination-dependent selectivity of Cu electrocatalysts for CO2reduction? A data-driven retrospective
Source: Royal Society of Chemistry journal article supplement (doi:10.1039/d2cp04576a), 2023-01-01
Supplement: d2cp04576a1.pdf [file d2cp04576a1.pdf]

## Supplementary Information

# What do we talk about, when we talk about single- crystal termination-dependent selectivity of Cu electro- catalysts for CO<sub>2</sub> reduction ? A data-driven retrospective

Kevin Rossi<sup>a</sup>

## Contents

|   |                                   |    |
|---|-----------------------------------|----|
| 1 | Data and Features                 | 2  |
| 2 | First Attempt - Out of the box ML | 9  |
| 3 | Synthetic Data                    | 20 |
| 4 | Outlier Detection                 | 34 |
| 5 | Data recalibration                | 45 |
| 6 | One-Hot Encoding                  | 56 |

# 1 Data and Features

| Author | Surface | CN6   | CN7   | CN8   | CN9  | CN10  | CN11 | V    |
|--------|---------|-------|-------|-------|------|-------|------|------|
| Hahn   | 100     | 0.00  | 0.00  | 1.00  | 0.00 | 0.00  | 0.00 | 0.89 |
| Hahn   | 100     | 0.00  | 0.00  | 1.00  | 0.00 | 0.00  | 0.00 | 0.97 |
| Hahn   | 100     | 0.00  | 0.00  | 1.00  | 0.00 | 0.00  | 0.00 | 1.04 |
| Hahn   | 100     | 0.00  | 0.00  | 1.00  | 0.00 | 0.00  | 0.00 | 1.10 |
| Hahn   | 111     | 0.00  | 0.00  | 0.00  | 1.00 | 0.00  | 0.00 | 0.89 |
| Hahn   | 111     | 0.00  | 0.00  | 0.00  | 1.00 | 0.00  | 0.00 | 0.98 |
| Hahn   | 111     | 0.00  | 0.00  | 0.00  | 1.00 | 0.00  | 0.00 | 1.04 |
| Hahn   | 111     | 0.00  | 0.00  | 0.00  | 1.00 | 0.00  | 0.00 | 1.10 |
| Hahn   | 751     | 0.167 | 0.167 | 0.167 | 0.00 | 0.167 | 0.33 | 0.89 |
| Hahn   | 751     | 0.167 | 0.167 | 0.167 | 0.00 | 0.167 | 0.33 | 0.97 |
| Hahn   | 751     | 0.167 | 0.167 | 0.167 | 0.00 | 0.167 | 0.33 | 1.04 |
| Hahn   | 751     | 0.167 | 0.167 | 0.167 | 0.00 | 0.167 | 0.33 | 1.10 |

Table 1: table of data points features, listed together with the corresponding surface terminations and data source.

| Author | Surface | CN6   | CN7   | CN8   | CN9   | CN10  | CN11  | V    |
|--------|---------|-------|-------|-------|-------|-------|-------|------|
| Hori   | 111     | 0.00  | 0.00  | 0.00  | 1.00  | 0.00  | 0.00  | 1.15 |
| Hori   | 100     | 0.00  | 0.00  | 1.00  | 0.00  | 0.00  | 0.00  | 1.00 |
| Hori   | 110     | 0.00  | 0.5   | 0.00  | 0.00  | 0.00  | 0.5   | 1.18 |
| Hori   | 211     | 0.00  | 0.33  | 0.00  | 0.33  | 0.33  | 0.00  | 0.98 |
| Hori   | 311     | 0.00  | 0.5   | 0.00  | 0.00  | 0.5   | 0.00  | 0.97 |
| Hori   | 511     | 0.00  | 0.33  | 0.33  | 0.00  | 0.33  | 0.00  | 0.96 |
| Hori   | 711     | 0.00  | 0.25  | 0.5   | 0.00  | 0.25  | 0.00  | 0.94 |
| Hori   | 911     | 0.00  | 0.2   | 0.6   | 0.00  | 0.2   | 0.00  | 0.96 |
| Hori   | 210     | 0.33  | 0.00  | 0.00  | 0.33  | 0.00  | 0.33  | 1.12 |
| Hori   | 310     | 0.25  | 0.00  | 0.25  | 0.25  | 0.00  | 0.25  | 1.02 |
| Hori   | 510     | 0.167 | 0.00  | 0.5   | 0.167 | 0.00  | 0.167 | 0.98 |
| Hori   | 610     | 0.143 | 0.00  | 0.571 | 0.143 | 0.00  | 0.143 | 0.97 |
| Hori   | 810     | 0.111 | 0.00  | 0.667 | 0.111 | 0.00  | 0.111 | 0.98 |
| Hori   | 331     | 0.00  | 0.33  | 0.00  | 0.33  | 0.00  | 0.33  | 1.15 |
| Hori   | 332     | 0.00  | 0.167 | 0.00  | 0.667 | 0.00  | 0.167 | 1.11 |
| Hori   | 533     | 0.00  | 0.25  | 0.00  | 0.5   | 0.25  | 0.00  | 1.02 |
| Hori   | 650     | 0.009 | 0.364 | 0.00  | 0.009 | 0.00  | 0.455 | 1.19 |
| Hori   | 755     | 0.00  | 0.167 | 0.00  | 0.667 | 0.167 | 0.00  | 1.03 |
| Hori   | 320     | 0.2   | 0.2   | 0.00  | 0.2   | 0.00  | 0.4   | 1.12 |

Table 2: table of data points features, listed together with the corresponding surface terminations and data source.

| Author | Surface | CN6  | CN7  | CN8  | CN9  | CN10 | CN11 | V    |
|--------|---------|------|------|------|------|------|------|------|
| Huang  | 100     | 0.00 | 0.00 | 1.00 | 0.00 | 0.00 | 0.00 | 0.85 |
| Huang  | 100     | 0.00 | 0.00 | 1.00 | 0.00 | 0.00 | 0.00 | 0.9  |
| Huang  | 100     | 0.00 | 0.00 | 1.00 | 0.00 | 0.00 | 0.00 | 0.95 |
| Huang  | 100     | 0.00 | 0.00 | 1.00 | 0.00 | 0.00 | 0.00 | 1.00 |
| Huang  | 100     | 0.00 | 0.00 | 1.00 | 0.00 | 0.00 | 0.00 | 1.05 |
| Huang  | 100     | 0.00 | 0.00 | 1.00 | 0.00 | 0.00 | 0.00 | 1.10 |
| Huang  | 100     | 0.00 | 0.00 | 1.00 | 0.00 | 0.00 | 0.00 | 1.15 |
| Huang  | 100     | 0.00 | 0.00 | 1.00 | 0.00 | 0.00 | 0.00 | 1.20 |
| Huang  | 100     | 0.00 | 0.00 | 1.00 | 0.00 | 0.00 | 0.00 | 1.25 |
| Huang  | 110     | 0.00 | 0.5  | 0.00 | 0.00 | 0.00 | 0.5  | 0.9  |
| Huang  | 110     | 0.00 | 0.5  | 0.00 | 0.00 | 0.00 | 0.5  | 1.00 |
| Huang  | 110     | 0.00 | 0.5  | 0.00 | 0.00 | 0.00 | 0.5  | 1.05 |
| Huang  | 110     | 0.00 | 0.5  | 0.00 | 0.00 | 0.00 | 0.5  | 1.10 |
| Huang  | 110     | 0.00 | 0.5  | 0.00 | 0.00 | 0.00 | 0.5  | 1.15 |
| Huang  | 110     | 0.00 | 0.5  | 0.00 | 0.00 | 0.00 | 0.5  | 1.20 |
| Huang  | 110     | 0.00 | 0.5  | 0.00 | 0.00 | 0.00 | 0.5  | 1.25 |
| Huang  | 111     | 0.00 | 0.00 | 0.00 | 1.00 | 0.00 | 0.00 | 0.9  |
| Huang  | 111     | 0.00 | 0.00 | 0.00 | 1.00 | 0.00 | 0.00 | 0.95 |
| Huang  | 111     | 0.00 | 0.00 | 0.00 | 1.00 | 0.00 | 0.00 | 1.00 |
| Huang  | 111     | 0.00 | 0.00 | 0.00 | 1.00 | 0.00 | 0.00 | 1.05 |
| Huang  | 111     | 0.00 | 0.00 | 0.00 | 1.00 | 0.00 | 0.00 | 1.10 |
| Huang  | 111     | 0.00 | 0.00 | 0.00 | 1.00 | 0.00 | 0.00 | 1.15 |
| Huang  | 111     | 0.00 | 0.00 | 0.00 | 1.00 | 0.00 | 0.00 | 1.20 |
| Huang  | 111     | 0.00 | 0.00 | 0.00 | 1.00 | 0.00 | 0.00 | 1.25 |

Table 3: table of data points features, listed together with the corresponding surface terminations and data source.

| Aut  | Sur | H2   | CO   | CH4  | C2H4 | EtOH | PrOH | PrD  | MeD  | Ac   | HCOOH | AlOH |
|------|-----|------|------|------|------|------|------|------|------|------|-------|------|
| Hahn | 100 | 37.5 | 5.50 | 2.50 | 24.1 | 2.00 | 3.40 | 0.00 | 0.00 | 0.00 | 0.4   | 15.7 |
| Hahn | 100 | 15.6 | 0.80 | 8.40 | 38.6 | 14.7 | 7.20 | 2.20 | 0.00 | 0.00 | 0.5   | 2.10 |
| Hahn | 100 | 19.1 | 0.4  | 22.8 | 34.9 | 11.7 | 3.50 | 1.20 | 0.3  | 0.00 | 0.4   | 0.7  |
| Hahn | 100 | 38.8 | 0.3  | 44.3 | 16.3 | 5.80 | 0.8  | 0.00 | 0.00 | 0.00 | 0.2   | 0.4  |
| Hahn | 111 | 47.1 | 15.3 | 0.9  | 3.00 | 0.00 | 0.00 | 0.00 | 0.00 | 0.00 | 0.00  | 29.3 |
| Hahn | 111 | 27.5 | 7.60 | 9.40 | 24.2 | 5.30 | 5.20 | 1.80 | 0.8  | 0.00 | 0.7   | 7.30 |
| Hahn | 111 | 15.6 | 1.50 | 34.3 | 21.0 | 9.40 | 3.50 | 1.40 | 0.5  | 0.00 | 0.5   | 3.40 |
| Hahn | 111 | 29.4 | 0.7  | 42.3 | 15.6 | 7.70 | 1.50 | 0.4  | 0.2  | 0.00 | 0.3   | 0.8  |
| Hahn | 751 | 36.2 | 10.1 | 0.8  | 10.1 | 2.80 | 4.00 | 0.00 | 0.00 | 0.00 | 1.30  | 19.6 |
| Hahn | 751 | 24.7 | 3.90 | 13.2 | 28.5 | 8.90 | 6.60 | 2.30 | 0.7  | 0.00 | 0.5   | 6.50 |
| Hahn | 751 | 23.0 | 0.9  | 23.2 | 27.5 | 12.7 | 3.30 | 1.00 | 0.2  | 0.00 | 0.3   | 1.20 |
| Hahn | 751 | 38.0 | 0.6  | 29.2 | 22.6 | 11.0 | 2.00 | 0.9  | 0.2  | 0.00 | 0.5   | 0.5  |

Table 4: table of data points selectivities, together with the corresponding surface terminations, applied potential, and data source.

| Aut  | Surf | H2   | CO   | CH4  | C2H4  | EtOH | PrOH | PrD  | MeD  | Ac   | HCOOH | AlOH |
|------|------|------|------|------|-------|------|------|------|------|------|-------|------|
| Hori | 100  | 6.80 | 0.9  | 30.4 | 40.4  | 9.70 | 1.50 | 0.8  | 1.60 | 2.80 | 1.00  | 3.00 |
| Hori | 111  | 16.3 | 6.40 | 46.3 | 8.30  | 2.60 | 0.00 | 0.7  | 2.10 | 0.6  | 1.50  | 11.5 |
| Hori | 110  | 3.10 | 13.9 | 6.90 | 13.5  | 10.5 | 0.04 | 0.00 | 19.9 | 1.30 | 20.8  | 10.1 |
| Hori | 211  | 11.2 | 2.10 | 45.6 | 17.8  | 3.40 | 1.30 | 0.7  | 0.3  | 2.00 | 0.5   | 13.6 |
| Hori | 311  | 13.3 | 2.60 | 36.0 | 23.8  | 3.30 | 1.50 | 0.4  | 1.10 | 2.30 | 0.6   | 14.0 |
| Hori | 511  | 18.1 | 1.90 | 11.4 | 39.0  | 12.2 | 3.30 | 1.60 | 1.40 | 3.00 | 0.8   | 8.80 |
| Hori | 711  | 15.6 | 1.10 | 5.00 | 50.0  | 7.40 | 4.60 | 2.20 | 1.20 | 5.20 | 0.9   | 4.60 |
| Hori | 911  | 12.7 | 0.00 | 5.70 | 50.9  | 16.9 | 4.50 | 2.50 | 1.20 | 2.40 | 1.10  | 3.50 |
| Hori | 210  | 7.00 | 2.20 | 64.0 | 13.4  | 6.60 | 0.5  | 0.2  | 0.9  | 0.6  | 0.7   | 5.50 |
| Hori | 310  | 12.8 | 0.00 | 17.7 | 34.6  | 29.9 | 1.90 | 0.9  | 1.70 | 2.60 | 1.60  | 2.70 |
| Hori | 510  | 10.5 | 2.10 | 8.10 | 42.3  | 26.1 | 1.70 | 1.70 | 3.00 | 2.60 | 2.10  | 2.90 |
| Hori | 610  | 9.00 | 0.9  | 7.60 | 44.71 | 26.0 | 2.00 | 1.30 | 1.50 | 1.20 | 1.60  | 1.40 |
| Hori | 810  | 8.70 | 1.40 | 6.40 | 45.1  | 26.0 | 1.90 | 0.9  | 0.9  | 1.10 | 1.60  | 1.50 |
| Hori | 320  | 5.30 | 5.40 | 52.4 | 13.7  | 6.50 | 0.4  | 0.3  | 3.20 | 0.6  | 4.80  | 5.80 |
| Hori | 331  | 5.70 | 7.70 | 13.8 | 16.6  | 15.6 | 0.4  | 0.00 | 7.10 | 0.5  | 7.50  | 9.10 |
| Hori | 332  | 10.3 | 6.10 | 39.6 | 9.90  | 7.10 | 0.2  | 0.3  | 5.10 | 0.2  | 3.40  | 9.40 |
| Hori | 533  | 4.70 | 3.00 | 62.9 | 13.0  | 1.90 | 0.4  | 0.5  | 0.6  | 0.7  | 0.5   | 9.70 |
| Hori | 650  | 2.50 | 14.5 | 10.5 | 16.2  | 10.9 | 0.00 | 0.00 | 16.2 | 0.8  | 20.6  | 6.10 |
| Hori | 755  | 6.90 | 4.40 | 62.9 | 11.5  | 5.30 | 0.6  | 0.7  | 0.6  | 1.20 | 0.5   | 12.3 |

Table 5: table of data points selectivities, together with the corresponding surface terminations, applied potential, and data source.

| Ref   | Surf | H2   | CO   | CH4  | C2H4 | EtOH | PrOH | PrD  | MeD  | Ac   | HCOOH | AlOH |
|-------|------|------|------|------|------|------|------|------|------|------|-------|------|
| Huang | 100  | 66.6 | 4.87 | 1.87 | 15.8 | 0.00 | 0.00 | 0.00 | 0.00 | 0.00 | 0.00  | 9.02 |
| Huang | 100  | 62.2 | 2.73 | 2.38 | 18.8 | 0.84 | 0.00 | 0.55 | 0.00 | 0.00 | 0.00  | 8.21 |
| Huang | 100  | 54.7 | 2.24 | 5.76 | 26.0 | 4.09 | 0.00 | 0.24 | 0.00 | 0.00 | 0.00  | 4.93 |
| Huang | 100  | 35.7 | 1.41 | 17.6 | 30.6 | 6.49 | 0.00 | 0.77 | 0.00 | 0.00 | 0.00  | 4.06 |
| Huang | 100  | 37.3 | 1.24 | 27.  | 21.9 | 2.72 | 0.00 | 0.68 | 0.00 | 0.00 | 0.00  | 4.23 |
| Huang | 100  | 59.5 | 0.11 | 30.4 | 6.82 | 1.73 | 0.00 | 0.07 | 0.00 | 0.00 | 0.00  | 1.33 |
| Huang | 100  | 68.6 | 0.04 | 27.6 | 1.01 | 0.00 | 0.00 | 0.00 | 0.00 | 0.00 | 0.00  | 1.22 |
| Huang | 100  | 80.4 | 0.04 | 22.1 | 0.47 | 0.00 | 0.00 | 0.00 | 0.00 | 0.00 | 0.00  | 0.48 |
| Huang | 100  | 77.2 | 0.02 | 18.4 | 0.16 | 0.00 | 0.00 | 0.00 | 0.00 | 0.00 | 0.00  | 0.28 |
| Huang | 110  | 63.9 | 5.95 | 0.91 | 3.19 | 0.00 | 0.00 | 0.00 | 0.00 | 0.00 | 0.00  | 22.7 |
| Huang | 110  | 57.5 | 2.54 | 6.91 | 17.1 | 6.40 | 0.00 | 0.00 | 0.00 | 0.00 | 0.00  | 9.27 |
| Huang | 110  | 33.7 | 2.63 | 21.6 | 25.2 | 7.41 | 0.00 | 1.15 | 0.00 | 0.00 | 0.00  | 4.98 |
| Huang | 110  | 29.0 | 2.23 | 31.4 | 23.8 | 6.76 | 0.00 | 0.65 | 0.00 | 0.00 | 0.00  | 2.29 |
| Huang | 110  | 61.0 | 1.08 | 25.4 | 6.63 | 3.26 | 0.00 | 0.55 | 0.00 | 0.00 | 0.00  | 1.54 |
| Huang | 110  | 71.7 | 0.34 | 22.2 | 3.43 | 1.28 | 0.00 | 0.25 | 0.00 | 0.00 | 0.00  | 0.44 |
| Huang | 110  | 76.9 | 0.21 | 15.8 | 1.25 | 0.00 | 0.00 | 0.00 | 0.00 | 0.00 | 0.00  | 0.00 |
| Huang | 111  | 64.1 | 10.3 | 0.24 | 0.54 | 0.00 | 0.00 | 0.00 | 0.00 | 0.00 | 0.00  | 19.3 |
| Huang | 111  | 58.7 | 9.76 | 2.87 | 3.81 | 0.00 | 0.00 | 0.00 | 0.00 | 0.00 | 0.00  | 20.8 |
| Huang | 111  | 55.6 | 4.86 | 17.5 | 10.7 | 0.00 | 0.00 | 0.00 | 0.00 | 0.00 | 0.00  | 11.8 |
| Huang | 111  | 36.2 | 4.89 | 28.1 | 16.8 | 2.60 | 0.00 | 0.81 | 0.00 | 0.00 | 0.00  | 6.80 |
| Huang | 111  | 33.2 | 0.57 | 42.1 | 16.3 | 4.08 | 0.00 | 0.3  | 0.00 | 0.00 | 0.00  | 3.02 |
| Huang | 111  | 52.0 | 0.16 | 43.5 | 2.79 | 0.49 | 0.00 | 0.23 | 0.00 | 0.00 | 0.00  | 2.42 |
| Huang | 111  | 76.0 | 0.15 | 28.4 | 0.43 | 0.00 | 0.00 | 0.00 | 0.00 | 0.00 | 0.00  | 1.71 |
| Huang | 111  | 77.5 | 0.08 | 22.9 | 0.1  | 0.00 | 0.00 | 0.00 | 0.00 | 0.00 | 0.00  | 0.94 |

Table 6: table of data points selectivities, together with the corresponding surface terminations, applied potential, and data source.



## 2 First Attempt - Out of the box ML

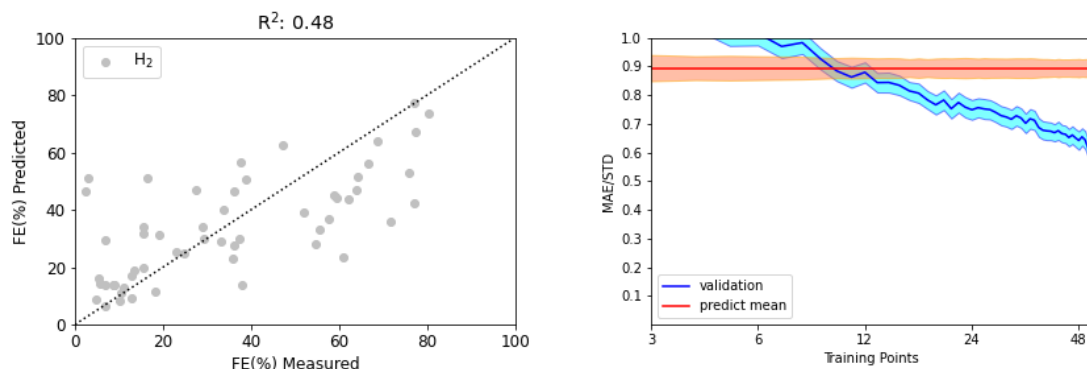

Figure S1: Left Panel: Parity plot between the predicted and measured FEs for H<sub>2</sub> production during CO<sub>2</sub> electroreduction on Cu single crystals with diverse terminations and at a number of applied voltages. Right Panel: MAE/STD (blue line) found for ML models prediction H<sub>2</sub> production during CO<sub>2</sub>RR as a function of the number of their training points. For reference, the orange line shows the MAE/STD incurred by a model which predicts the mean FE among the data in the full database regardless of the surface topology and the applied potential.

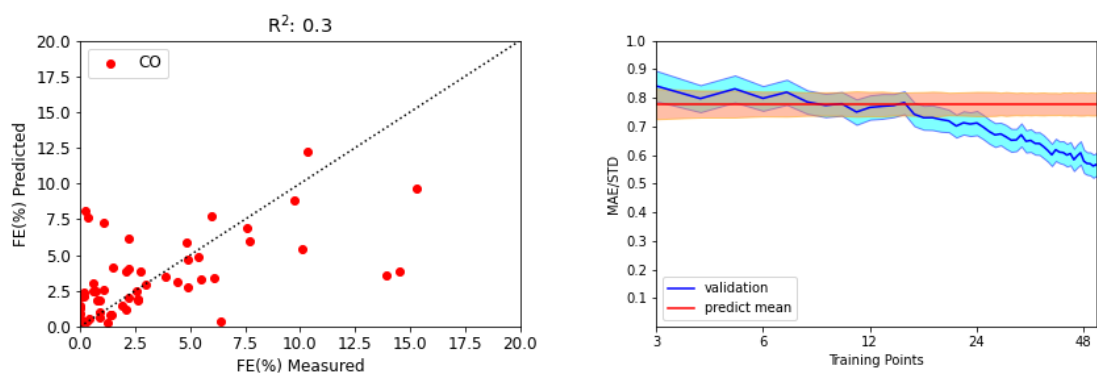

Figure S2: Left Panel: Parity plot between the predicted and measured FEs for CO production during  $\text{CO}_2$  electroreduction on Cu single crystals with diverse terminations and at a number of applied voltages. Right Panel: MAE/STD (blue line) found for ML models prediction CO production during  $\text{CO}_2\text{RR}$  as a function of the number of their training points. For reference, the orange line shows the MAE/STD incurred by a model which predicts the mean FE among the data in the full database regardless of the surface topology and the applied potential.

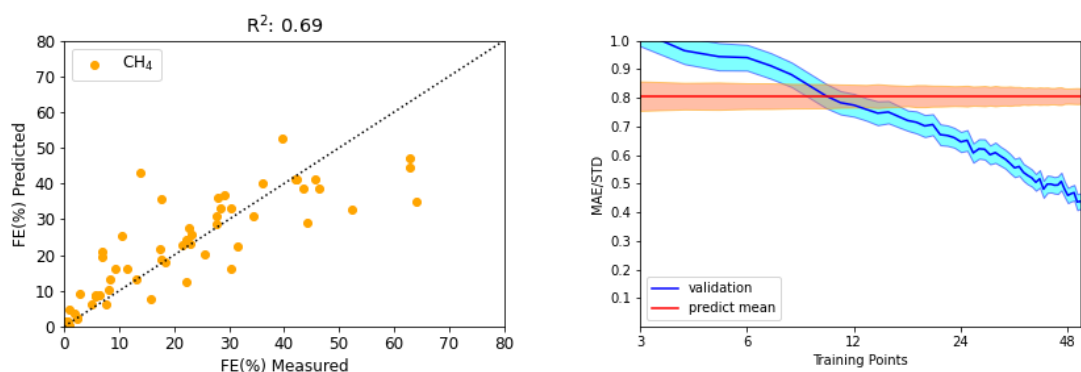

Figure S3: Left Panel: Parity plot between the predicted and measured FEs for CH<sub>4</sub> production during CO<sub>2</sub> electroreduction on Cu single crystals with diverse terminations and at a number of applied voltages. Right Panel: MAE/STD (blue line) found for ML models prediction CH<sub>4</sub> production during CO<sub>2</sub>RR as a function of the number of their training points. For reference, the orange line shows the MAE/STD incurred by a model which predicts the mean FE among the data in the full database regardless of the surface topology and the applied potential.

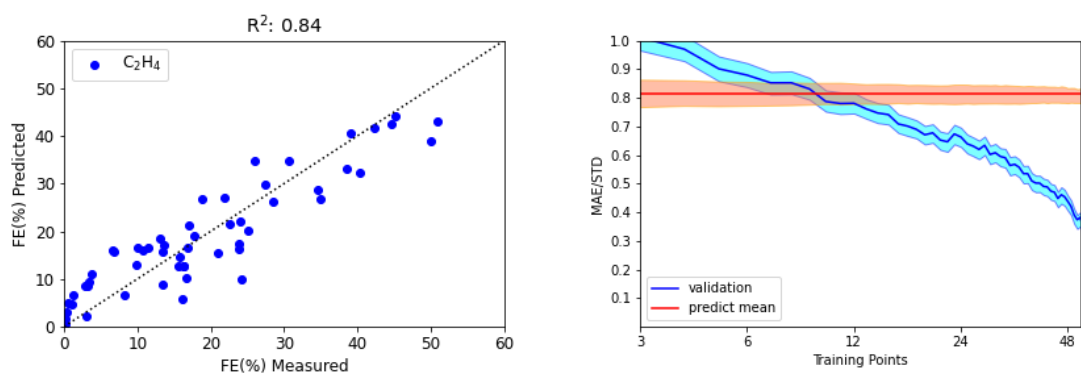

Figure S4: Left Panel: Parity plot between the predicted and measured FEs for  $C_2H_4$  production during  $CO_2$  electroreduction on Cu single crystals with diverse terminations and at a number of applied voltages. Right Panel: MAE/STD (blue line) found for ML models prediction  $C_2H_4$  production during  $CO_2$ RR as a function of the number of their training points. For reference, the orange line shows the MAE/STD incurred by a model which predicts the mean FE among the data in the full database regardless of the surface topology and the applied potential.

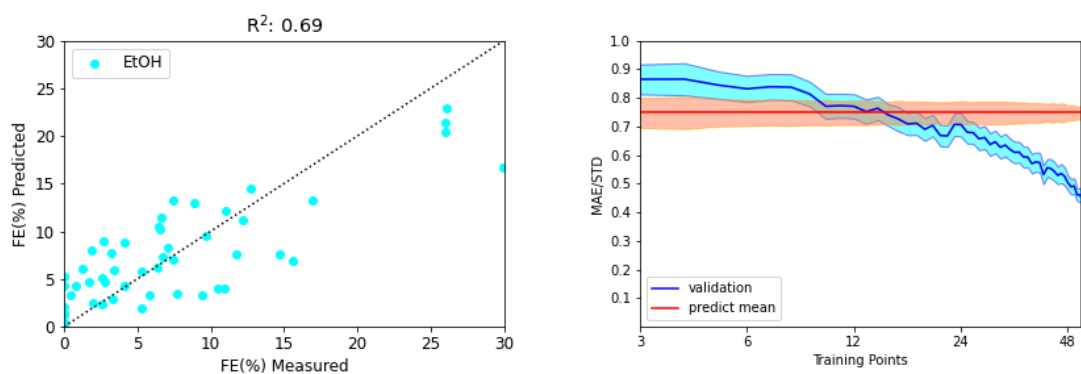

Figure S5: Left Panel: Parity plot between the predicted and measured FEs for EtOH production during CO<sub>2</sub> electroreduction on Cu single crystals with diverse terminations and at a number of applied voltages. Right Panel: MAE/STD (blue line) found for ML models prediction EtOH production during CO<sub>2</sub>RR as a function of the number of their training points. For reference, the orange line shows the MAE/STD incurred by a model which predicts the mean FE among the data in the full database regardless of the surface topology and the applied potential. For reference, the orange line shows the MAE/STD incurred by a model which predicts the mean FE among the data in the full database regardless of the surface topology and the applied potential.

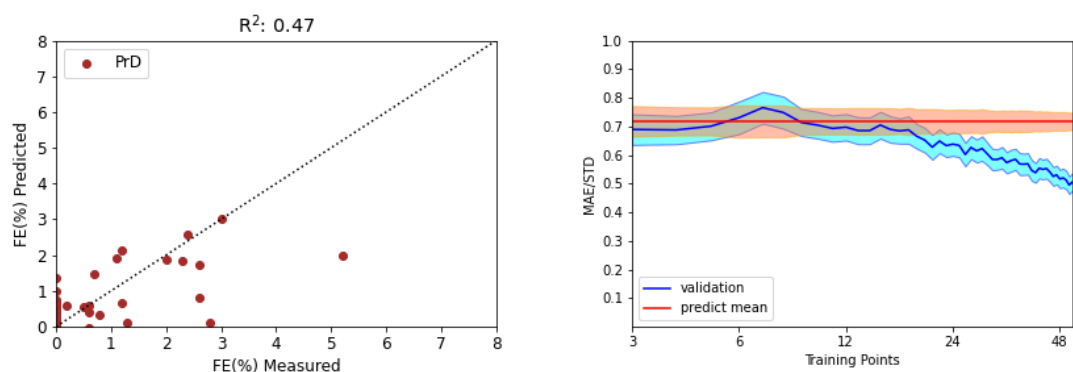

Figure S6: Left Panel: Parity plot between the predicted and measured FEs for PrD production during CO<sub>2</sub> electroreduction on Cu single crystals with diverse terminations and at a number of applied voltages. Right Panel: MAE/STD (blue line) found for ML models prediction PrD production during CO<sub>2</sub>RR as a function of the number of their training points. For reference, the orange line shows the MAE/STD incurred by a model which predicts the mean FE among the data in the full database regardless of the surface topology and the applied potential.

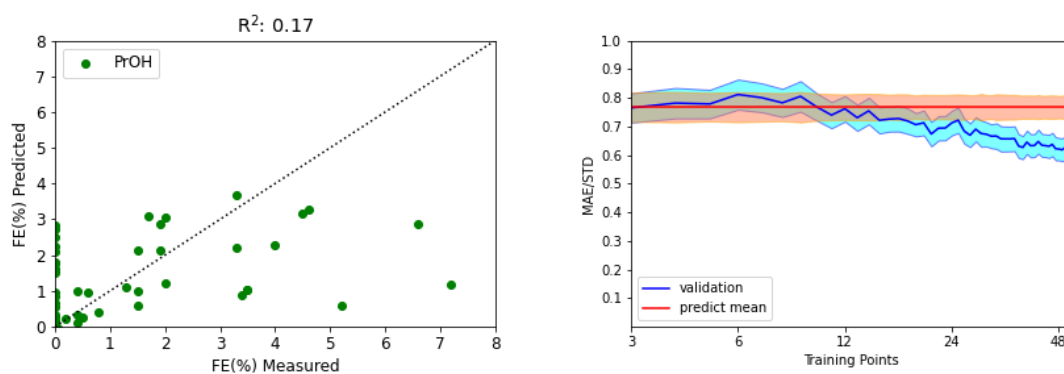

Figure S7: Left Panel: Parity plot between the predicted and measured FEs for PrOH production during  $\text{CO}_2$  electroreduction on Cu single crystals with diverse terminations and at a number of applied voltages. Right Panel: MAE/STD (blue line) found for ML models prediction PrOH production during  $\text{CO}_2\text{RR}$  as a function of the number of their training points. For reference, the orange line shows the MAE/STD incurred by a model which predicts the mean FE among the data in the full database regardless of the surface topology and the applied potential.

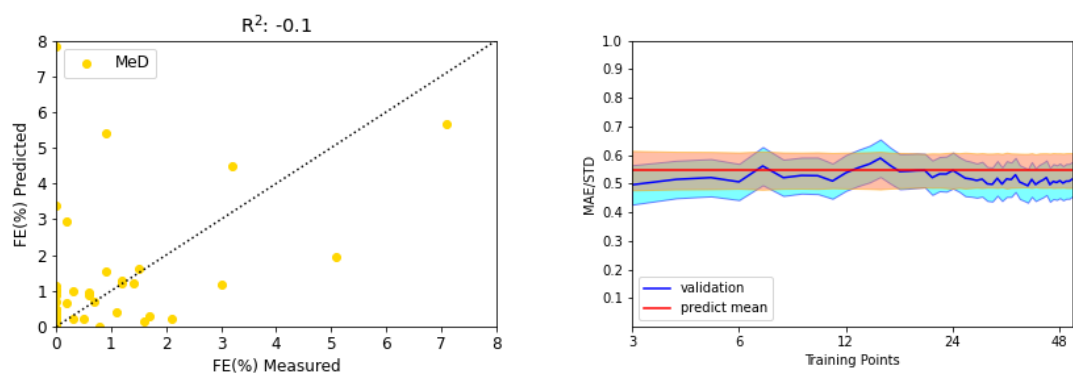

Figure S8: Left Panel: Parity plot between the predicted and measured FEs for MeD production during  $\text{CO}_2$  electroreduction on Cu single crystals with diverse terminations and at a number of applied voltages. Right Panel: MAE/STD (blue line) found for ML models prediction MeD production during  $\text{CO}_2\text{RR}$  as a function of the number of their training points. For reference, the orange line shows the MAE/STD incurred by a model which predicts the mean FE among the data in the full database regardless of the surface topology and the applied potential.



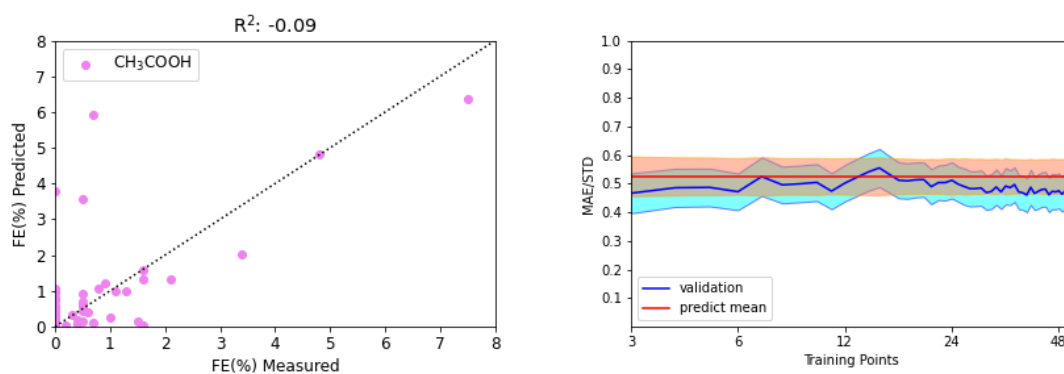

Figure S9: Left Panel: Parity plot between the predicted and measured FEs for CH<sub>3</sub>COOH production during CO<sub>2</sub> electroreduction on Cu single crystals with diverse terminations and at a number of applied voltages. Right Panel: MAE/STD (blue line) found for ML models prediction CH<sub>3</sub>COOH production during CO<sub>2</sub>RR as a function of the number of their training points. For reference, the orange line shows the MAE/STD incurred by a model which predicts the mean FE among the data in the full database regardless of the surface topology and the applied potential.

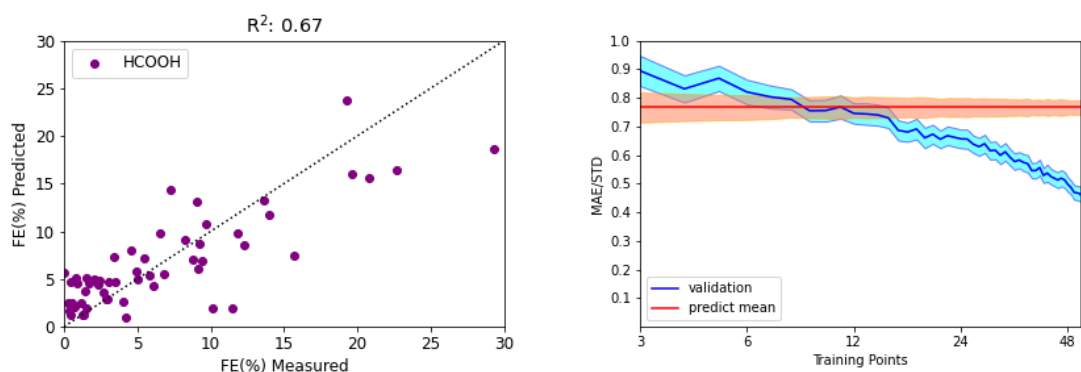

Figure S10: Left Panel: Parity plot between the predicted and measured FEs for HCOOH production during CO<sub>2</sub> electroreduction on Cu single crystals with diverse terminations and at a number of applied voltages. Right Panel: MAE/STD (blue line) found for ML models prediction HCOOH production during CO<sub>2</sub>RR as a function of the number of their training points. For reference, the orange line shows the MAE/STD incurred by a model which predicts the mean FE among the data in the full database regardless of the surface topology and the applied potential.

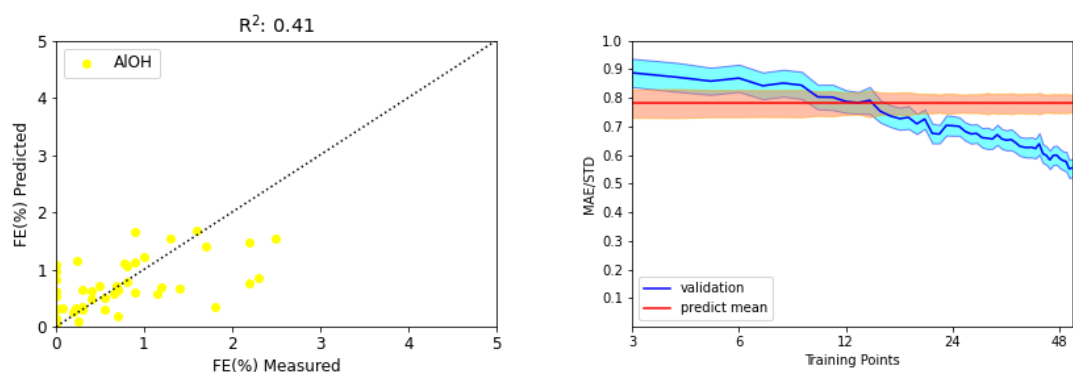

Figure S11: Left Panel: Parity plot between the predicted and measured FEs for AIOH production during  $\text{CO}_2$  electroreduction on Cu single crystals with diverse terminations and at a number of applied voltages. Right Panel: MAE/STD (blue line) found for ML models prediction AIOH production during  $\text{CO}_2\text{RR}$  as a function of the number of their training points. For reference, the orange line shows the MAE/STD incurred by a model which predicts the mean FE among the data in the full database regardless of the surface topology and the applied potential.

### 3 Synthetic Data

Synthetic data are generated according to the following criterion: i) all products display non-trivial, non-monotonic trends as a function of the overpotential and coordination distributions; ii) hydrogen is the majority product at high and low overpotentials; iii) FEs for CH<sub>4</sub> or C<sub>2</sub>H<sub>4</sub> are highest at moderate overpotentials; iii) surfaces abundant in 9-coordinated atoms (e.g., (111)-terminated) are selective for CH<sub>4</sub>, while surfaces rich in 8-coordinated atoms (e.g., (100)-terminated) are selective for C<sub>2</sub> products; iv) the synthetic data FEs standard deviations are comparable to the one of the experimental data (albeit the FEs distributions also show relatively different skewness and kurtosis). By design, the analytical equations for generating synthetic data are written down as a function of the exact same features that are adopted by the ML model. This benchmark is therefore built solely to verify the capability of the model in learning non-trivial equations, in a low-data regime, in the scenario where the model input feature are exactly related to the generated synthetic data. By the same reason, the 55 datapoints are obtained from the generating equations (Equation S1-S11) for the exact same voltages and coordination distributions reported by Hori2003, Huang2017, or Hahn2017.

The following analytical equations are used as the generators of the FE distributions, as a function of the applied potential and coordination distributions:

$$fe_{H_2} = \exp(0.1 * fe_{H_2}^0) / fe_{tot} \quad (1)$$

$$fe_{co} = \exp(0.1 * fe_{co}^0) / fe_{tot} \quad (2)$$

$$fe_{CH_4} = \exp(0.1 * fe_{CH_4}^0) / fe_{tot} \quad (3)$$

$$fe_{C_2H_4} = \exp(0.1 * fe_{C_2H_4}^0) / fe_{tot} \quad (4)$$

$$fe_{eth} = \exp(0.1 * fe_{eth}^0) / fe_{tot} \quad (5)$$

$$fe_{prd} = \exp(0.1 * fe_{prd}^0) / fe_{tot} \quad (6)$$

$$fe_{proh} = \exp(0.1 * fe_{proh}^0) / fe_{tot} \quad (7)$$

$$fe_{aloh} = \exp(0.1 * fe_{aloh}^0) / fe_{tot} \quad (8)$$

$$fe_{hcooh} = \exp(0.1 * fe_{hcooh}^0) / fe_{tot} \quad (9)$$

$$fe_{ch3cooh} = \exp(0.1 * fe_{ch3cooh}^0) / fe_{tot} \quad (10)$$

$$fe_{md} = \exp(0.1 * fe_{md}^0) / fe_{tot} \quad (11)$$

where

$$fe_{tot} = \exp(0.1 * fe_{H_2}^0) + \exp(0.1 * fe_{co}^0) + \exp(0.1 * fe_{CH_4}^0) + \exp(0.1 * fe_{C_2H_4}^0) + \exp(0.1 * fe_{eth}^0) + \exp(0.1 * fe_{prd}^0) + \exp(0.1 * fe_{proh}^0) + \exp(0.1 * fe_{aloh}^0) + \exp(0.1 * fe_{ch3cooh}^0) + \exp(0.1 * fe_{md}^0) \quad (12)$$

and

$$fe_{H_2}^0 = ((voltage + 1.1) ** 2) * (300) * (6 * cn6 + 5 * cn7 + 4 * cn8 + 3 * cn9 + 2 * cn10 + 1 * cn11) + 10 * (6 * cn6 + 5 * cn7 + 4 * cn8 + 3 * cn9 + 2 * cn10 + 1 * cn11) \quad (13)$$

$$fe_{co}^0 = ((-1.1 - voltage) ** 2) * (-250) * (6 * cn6 + 3 * cn7 + 2 * cn8 + 1 * cn9 + 1 * cn10 + 1 * cn11) + 10 * (4 * cn6 + 2 * cn7 + 2 * cn8 + 1 * cn9 + 1 * cn10 + 1 * cn11) \quad (14)$$

$$fe_{CH_4}^0 = ((-1.2 - voltage) ** 2) * (-250) * (1 * cn6 + 2 * cn7 + 3 * cn8 + 6 * cn9 + 2 * cn10 + 1 * cn11) + 10 * (1 * cn6 + 2 * cn7 + 3 * cn8 + 6 * cn9 + 2 * cn10 + 1 * cn11) \quad (15)$$

$$fe_{C_2H_4}^0 = ((-1.0 - voltage) ** 2) * (-250) * (2 * cn6 + 6 * cn7 + 6 * cn8 + 3 * cn9 + 2 * cn10 + 1 * cn11) + 10 * (2 * cn6 + 2 * cn7 + 6 * cn8 + 2 * cn9 + 1 * cn10 + 1 * cn11) \quad (16)$$

$$fe_{eth}^0 = ((-1.1 - voltage) ** 2) * (-250) * (3 * cn6 + 4 * cn7 + 5 * cn8 + 3 * cn9 + 2 * cn10 + 1 * cn11) + 10 * (1 * cn6 + 2 * cn7 + 5 * cn8 + 2 * cn9 + 1 * cn10 + 1 * cn11) \quad (17)$$

$$fe_{prd}^0 = ((-1.1 - voltage) ** 2) * (-250) * (2 * cn6 + 1 * cn7 + 1 * cn8 + 1 * cn9 + 2 * cn10 + 1 * cn11) + 10 * (2 * cn6 + 1 * cn7 + 1 * cn8 + 1 * cn9 + 2 * cn10 + 1 * cn11) \quad (18)$$

$$fe_{proh}^0 = ((-1.1 - voltage) ** 2) * (-250) * (1 * cn6 + 2 * cn7 + 1 * cn8 + 1 * cn9 + 1 * cn10 + 2 * cn11) + 10 * (1 * cn6 + 2 * cn7 + 1 * cn8 + 1 * cn9 + 1 * cn10 + 2 * cn11) \quad (19)$$

$$fe_{aloh}^0 = ((-1.1 - voltage) ** 2) * (-250) * (1 * cn6 + 1 * cn7 + 2 * cn8 + 1 * cn9 + 2 * cn10 + 1 * cn11) + 10 * (1 * cn6 + 1 * cn7 + 2 * cn8 + 1 * cn9 + 2 * cn10 + 1 * cn11) \quad (20)$$

$$f e_{hcooh}^0 = ((-0.8 - voltage) ** 2) * (-250) * (2 * cn6 + 3 * cn7 + 1 * cn8 + 2 * cn9 + 2 * cn10 + 1 * cn11) + \quad (21)$$

$$f e_{ch3cooh}^0 = ((-1.1 - voltage) ** 2) * (-250) * (1 * cn6 + 2 * cn7 + 2 * cn8 + 1 * cn9 + 1 * cn10 + 1 * cn11) + \quad (22)$$

$$10 * (1 * cn6 + 2 * cn7 + 2 * cn8 + 1 * cn9 + 1 * cn10 + 1 * cn11)$$

$$f e_{md}^0 = ((-1.1 - voltage) ** 2) * (-250) * (1 * cn6 + 1 * cn7 + 1 * cn8 + 1 * cn9 + 1 * cn10 + 1 * cn11) + \quad (23)$$

$$10 * (1 * cn6 + 1 * cn7 + 1 * cn8 + 1 * cn9 + 1 * cn10 + 1 * cn11)$$

As shown in Figures S23-S33, a model trained on these data displays steep learning rates as well as almost perfect accuracy metrics for leave-one-out cross-validation across the whole range of products.

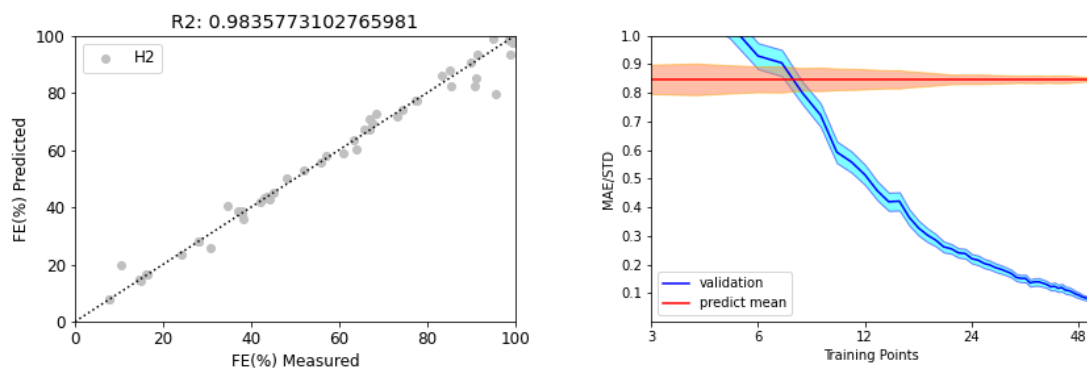

Figure S12: Left Panel: Parity plot between the predicted and measured FEs for H<sub>2</sub> production during CO<sub>2</sub> electroreduction on Cu single crystals with diverse terminations and at a number of applied voltages. Right Panel: MAE/STD (blue line) found for ML models prediction H<sub>2</sub> production during CO<sub>2</sub>RR as a function of the number of their training points. For reference, the orange line shows the MAE/STD incurred by a model which predicts the mean FE among the data in the full database regardless of the surface topology and the applied potential.

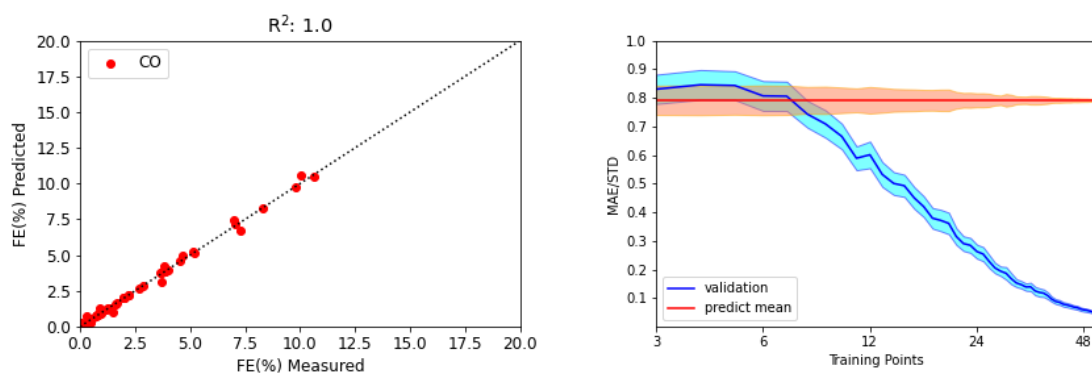

Figure S13: Left Panel: Parity plot between the predicted and measured FEs for CO<sub>2</sub> production during CO<sub>2</sub> electroreduction on Cu single crystals with diverse terminations and at a number of applied voltages. Right Panel: MAE/STD (blue line) found for ML models prediction CO<sub>2</sub> production during CO<sub>2</sub>RR as a function of the number of their training points. For reference, the orange line shows the MAE/STD incurred by a model which predicts the mean FE among the data in the full database regardless of the surface topology and the applied potential.



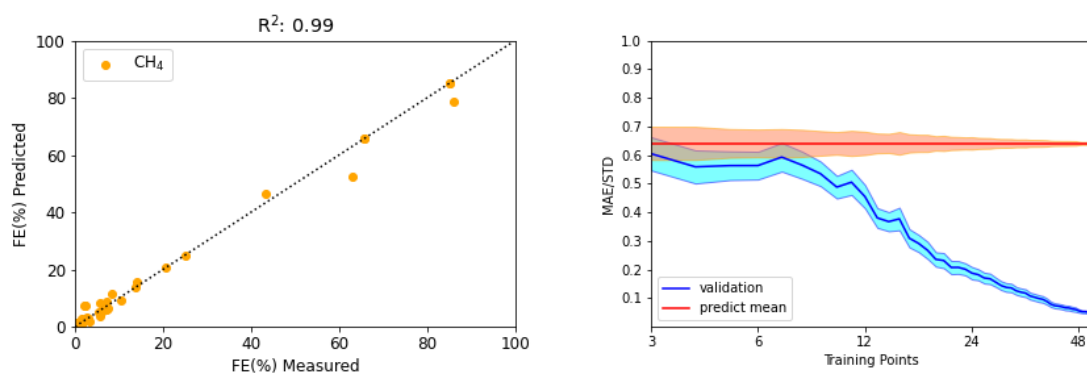

Figure S14: Left Panel: Parity plot between the predicted and measured FEs for CH<sub>4</sub> production during CO<sub>2</sub> electroreduction on Cu single crystals with diverse terminations and at a number of applied voltages. Right Panel: MAE/STD (blue line) found for ML models prediction CH<sub>4</sub> production during CO<sub>2</sub>RR as a function of the number of their training points. For reference, the orange line shows the MAE/STD incurred by a model which predicts the mean FE among the data in the full database regardless of the surface topology and the applied potential.

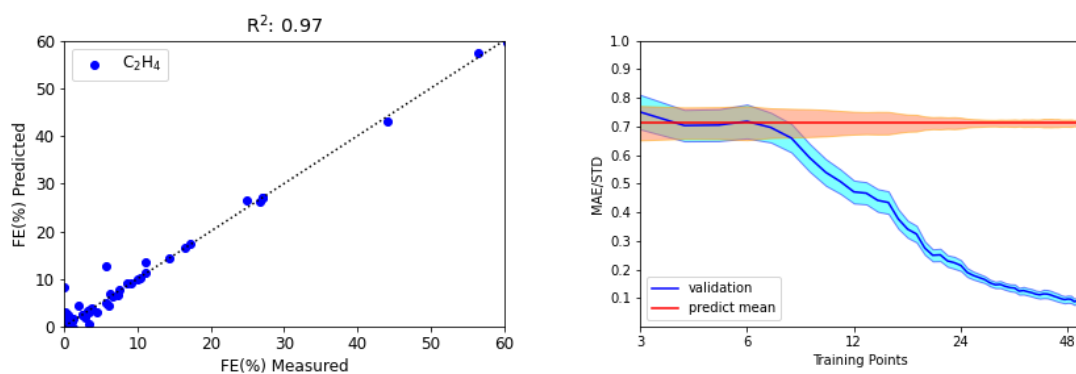

Figure S15: Left Panel: Parity plot between the predicted and measured FEs for  $C_2H_4$  production during  $CO_2$  electroreduction on Cu single crystals with diverse terminations and at a number of applied voltages. Right Panel: MAE/STD (blue line) found for ML models prediction  $C_2H_4$  production during  $CO_2$ RR as a function of the number of their training points. For reference, the orange line shows the MAE/STD incurred by a model which predicts the mean FE among the data in the full database regardless of the surface topology and the applied potential.

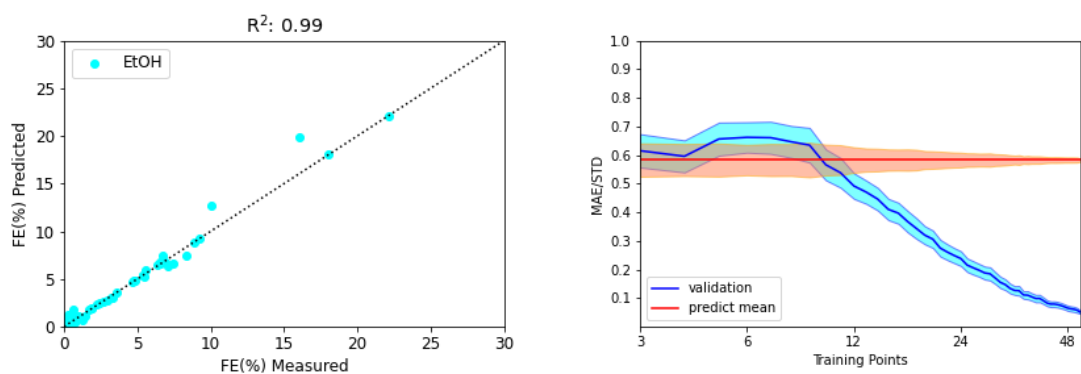

Figure S16: Left Panel: Parity plot between the predicted and measured FEs for EtOH production during CO<sub>2</sub> electroreduction on Cu single crystals with diverse terminations and at a number of applied voltages. Right Panel: MAE/STD (blue line) found for ML models prediction EtOH production during CO<sub>2</sub>RR as a function of the number of their training points. For reference, the orange line shows the MAE/STD incurred by a model which predicts the mean FE among the data in the full database regardless of the surface topology and the applied potential.

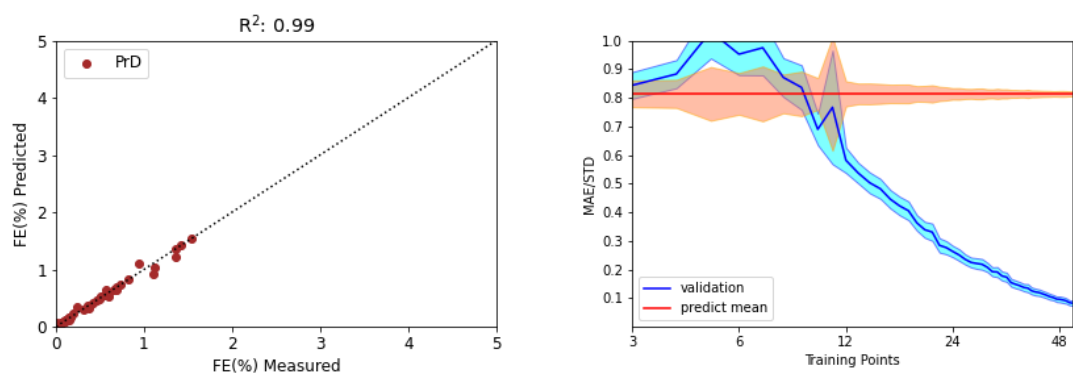

Figure S17: Left Panel: Parity plot between the predicted and measured FEs for PrD production during CO<sub>2</sub> electroreduction on Cu single crystals with diverse terminations and at a number of applied voltages. Right Panel: MAE/STD (blue line) found for ML models prediction PrD production during CO<sub>2</sub>RR as a function of the number of their training points. For reference, the orange line shows the MAE/STD incurred by a model which predicts the mean FE among the data in the full database regardless of the surface topology and the applied potential.

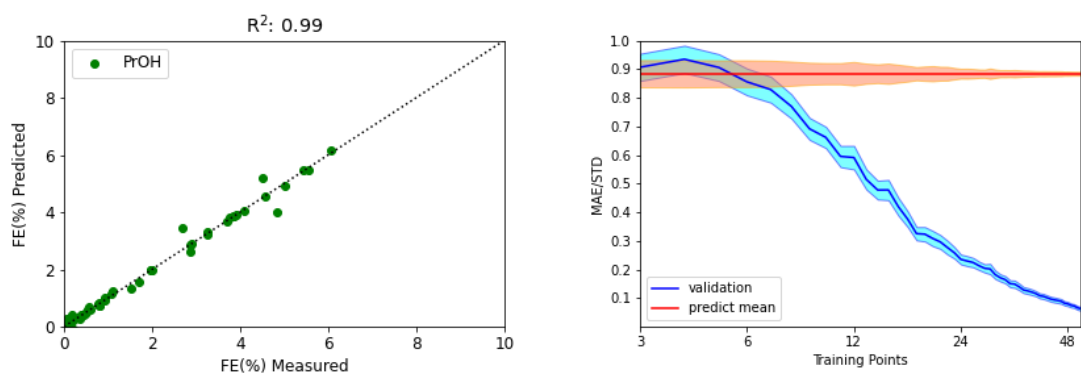

Figure S18: Left Panel: Parity plot between the predicted and measured FEs for PrOH production during  $\text{CO}_2$  electroreduction on Cu single crystals with diverse terminations and at a number of applied voltages. Right Panel: MAE/STD (blue line) found for ML models prediction PrOH production during  $\text{CO}_2\text{RR}$  as a function of the number of their training points. For reference, the orange line shows the MAE/STD incurred by a model which predicts the mean FE among the data in the full database regardless of the surface topology and the applied potential.

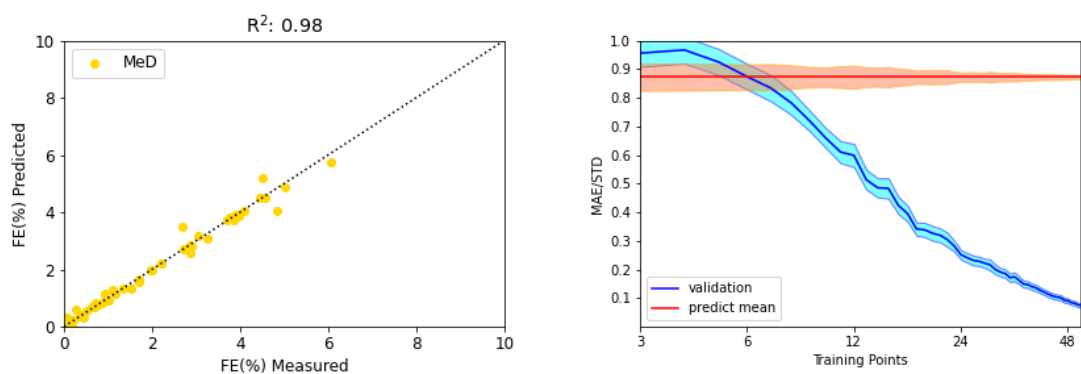

Figure S19: Left Panel: Parity plot between the predicted and measured FEs for MeD production during  $\text{CO}_2$  electroreduction on Cu single crystals with diverse terminations and at a number of applied voltages. Right Panel: MAE/STD (blue line) found for ML models prediction MeD production during  $\text{CO}_2\text{RR}$  as a function of the number of their training points. For reference, the orange line shows the MAE/STD incurred by a model which predicts the mean FE among the data in the full database regardless of the surface topology and the applied potential.

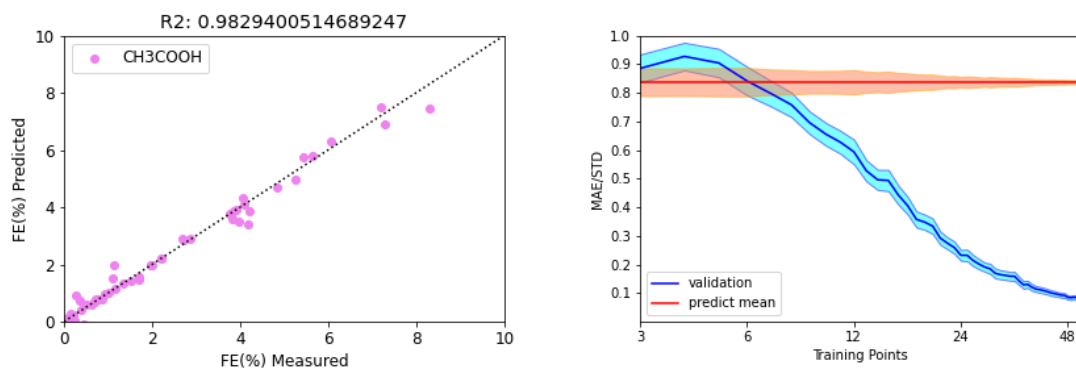

Figure S20: Left Panel: Parity plot between the predicted and measured FEs for  $\text{CH}_3\text{COOH}$  production during  $\text{CO}_2$  electroreduction on Cu single crystals with diverse terminations and at a number of applied voltages. Right Panel: MAE/STD (blue line) found for ML models prediction  $\text{CH}_3\text{COOH}$  production during  $\text{CO}_2\text{RR}$  as a function of the number of their training points. For reference, the orange line shows the MAE/STD incurred by a model which predicts the mean FE among the data in the full database regardless of the surface topology and the applied potential.

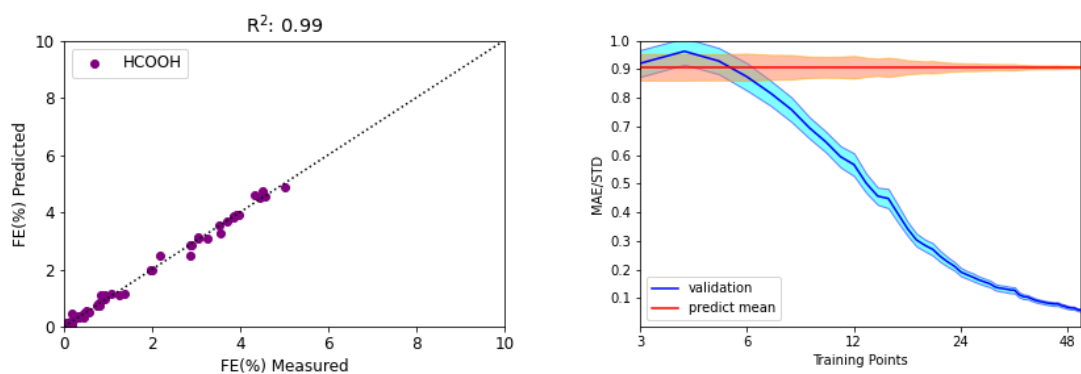

Figure S21: Left Panel: Parity plot between the predicted and measured FEs for HCOOH production during CO<sub>2</sub> electroreduction on Cu single crystals with diverse terminations and at a number of applied voltages. Right Panel: MAE/STD (blue line) found for ML models prediction HCOOH production during CO<sub>2</sub>RR as a function of the number of their training points. For reference, the orange line shows the MAE/STD incurred by a model which predicts the mean FE among the data in the full database regardless of the surface topology and the applied potential.



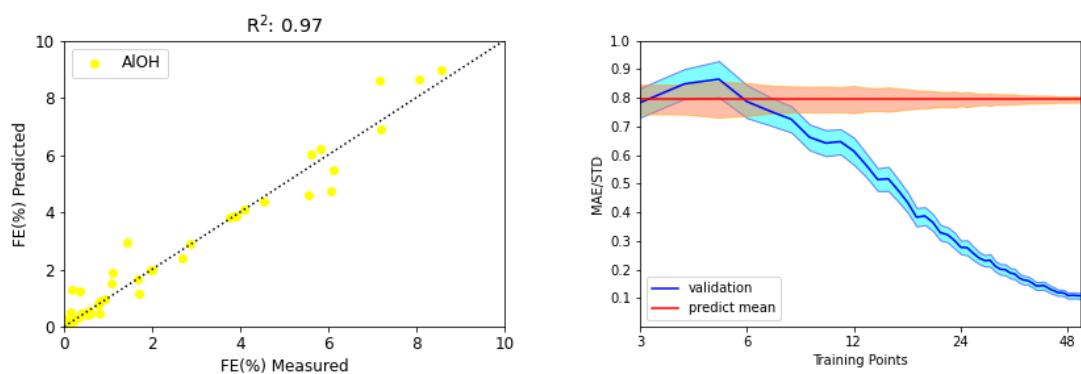

Figure S22: Left Panel: Parity plot between the predicted and measured FEs for AIOH production during  $\text{CO}_2$  electroreduction on Cu single crystals with diverse terminations and at a number of applied voltages. Right Panel: MAE/STD (blue line) found for ML models prediction AIOH production during  $\text{CO}_2\text{RR}$  as a function of the number of their training points. For reference, the orange line shows the MAE/STD incurred by a model which predicts the mean FE among the data in the full database regardless of the surface topology and the applied potential.

## 4 Outlier Detection

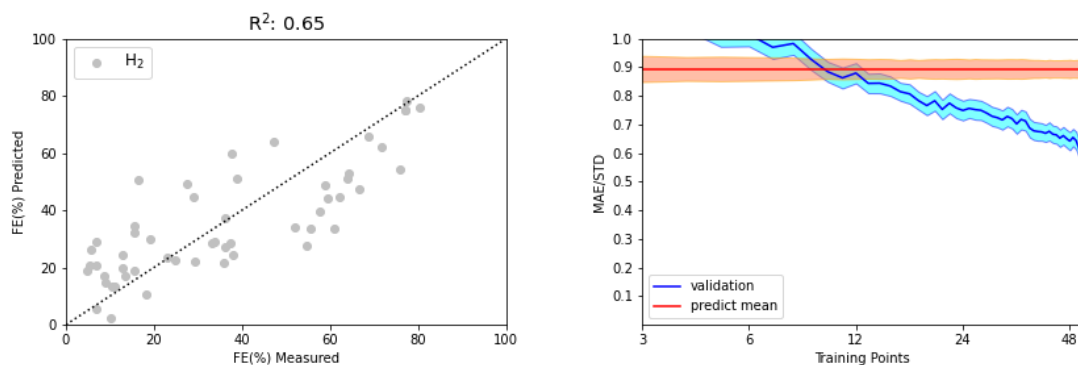

Figure S23: Left Panel: Parity plot between the predicted and measured FEs for H<sub>2</sub> production during CO<sub>2</sub> electroreduction on Cu single crystals with diverse terminations and at a number of applied voltages. Right Panel: MAE/STD (blue line) found for ML models prediction H<sub>2</sub> production during CO<sub>2</sub>RR as a function of the number of their training points. For reference, the orange line shows the MAE/STD incurred by a model which predicts the mean FE among the data in the full database regardless of the surface topology and the applied potential.

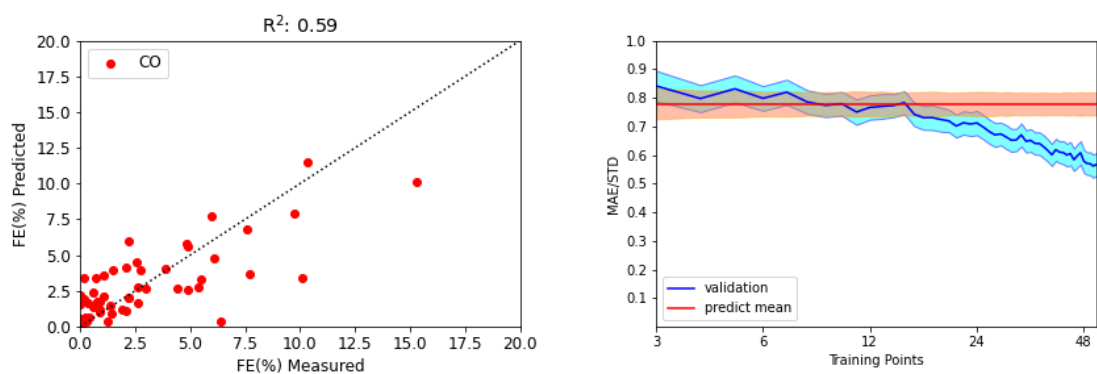

Figure S24: Left Panel: Parity plot between the predicted and measured FEs for CO<sub>2</sub> production during CO<sub>2</sub> electroreduction on Cu single crystals with diverse terminations and at a number of applied voltages. Right Panel: MAE/STD (blue line) found for ML models prediction CO<sub>2</sub> production during CO<sub>2</sub>RR as a function of the number of their training points. For reference, the orange line shows the MAE/STD incurred by a model which predicts the mean FE among the data in the full database regardless of the surface topology and the applied potential.

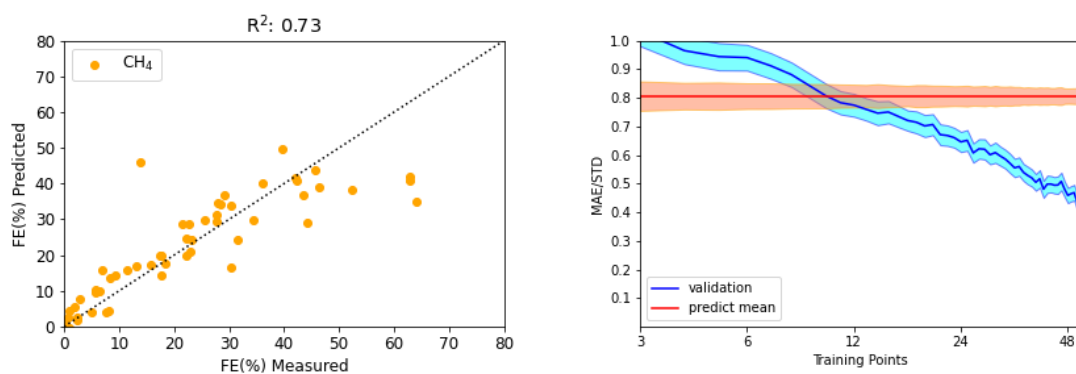

Figure S25: Left Panel: Parity plot between the predicted and measured FEs for CH<sub>4</sub> production during CO<sub>2</sub> electroreduction on Cu single crystals with diverse terminations and at a number of applied voltages. Right Panel: MAE/STD (blue line) found for ML models prediction CH<sub>4</sub> production during CO<sub>2</sub>RR as a function of the number of their training points. For reference, the orange line shows the MAE/STD incurred by a model which predicts the mean FE among the data in the full database regardless of the surface topology and the applied potential.

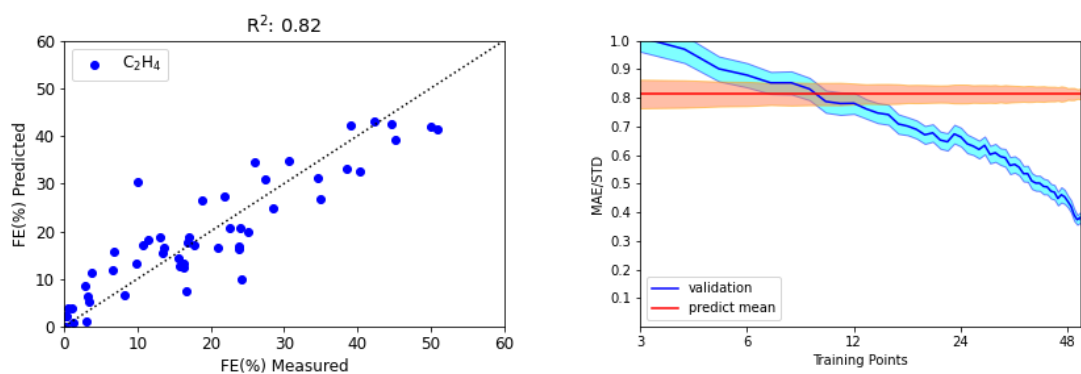

Figure S26: Left Panel: Parity plot between the predicted and measured FEs for  $C_2H_4$  production during  $CO_2$  electroreduction on Cu single crystals with diverse terminations and at a number of applied voltages. Right Panel: MAE/STD (blue line) found for ML models prediction  $C_2H_4$  production during  $CO_2RR$  as a function of the number of their training points. For reference, the orange line shows the MAE/STD incurred by a model which predicts the mean FE among the data in the full database regardless of the surface topology and the applied potential.

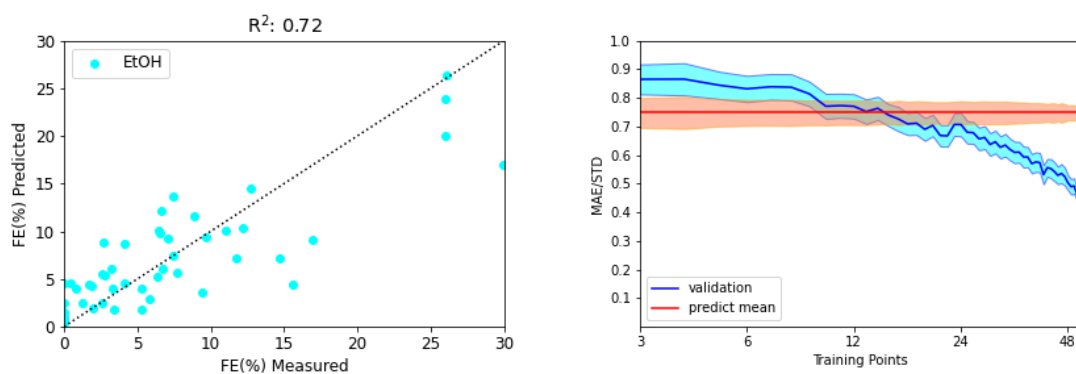

Figure S27: Left Panel: Parity plot between the predicted and measured FEs for EtOH production during CO<sub>2</sub> electroreduction on Cu single crystals with diverse terminations and at a number of applied voltages. Right Panel: MAE/STD (blue line) found for ML models prediction EtOH production during CO<sub>2</sub>RR as a function of the number of their training points. For reference, the orange line shows the MAE/STD incurred by a model which predicts the mean FE among the data in the full database regardless of the surface topology and the applied potential.

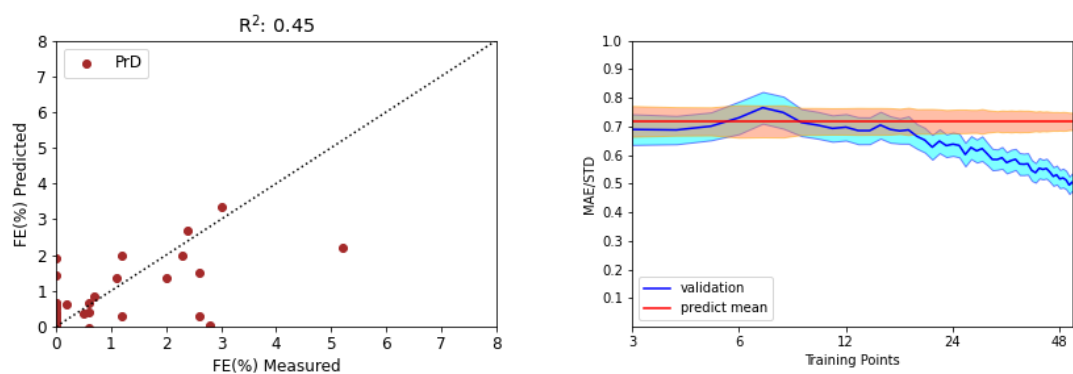

Figure S28: Left Panel: Parity plot between the predicted and measured FEs for PrD production during CO<sub>2</sub> electroreduction on Cu single crystals with diverse terminations and at a number of applied voltages. Right Panel: MAE/STD (blue line) found for ML models prediction PrD production during CO<sub>2</sub>RR as a function of the number of their training points. For reference, the orange line shows the MAE/STD incurred by a model which predicts the mean FE among the data in the full database regardless of the surface topology and the applied potential.

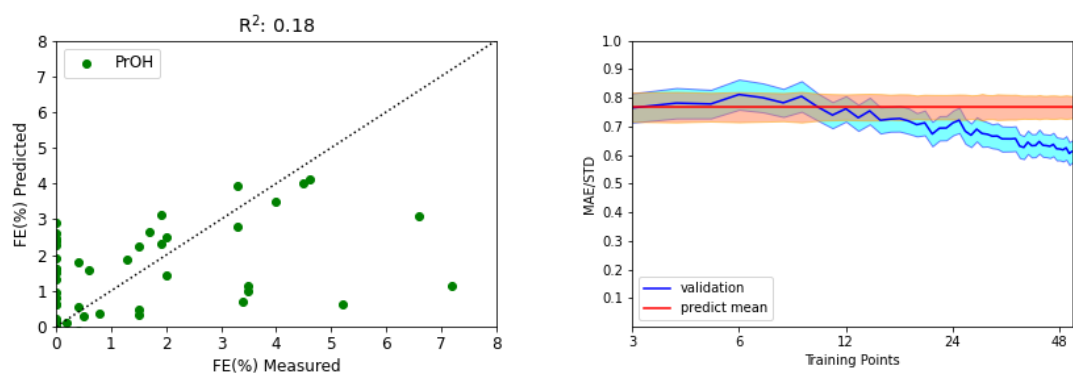

Figure S29: Left Panel: Parity plot between the predicted and measured FEs for PrOH production during  $\text{CO}_2$  electroreduction on Cu single crystals with diverse terminations and at a number of applied voltages. Right Panel: MAE/STD (blue line) found for ML models prediction PrOH production during  $\text{CO}_2\text{RR}$  as a function of the number of their training points. For reference, the orange line shows the MAE/STD incurred by a model which predicts the mean FE among the data in the full database regardless of the surface topology and the applied potential.



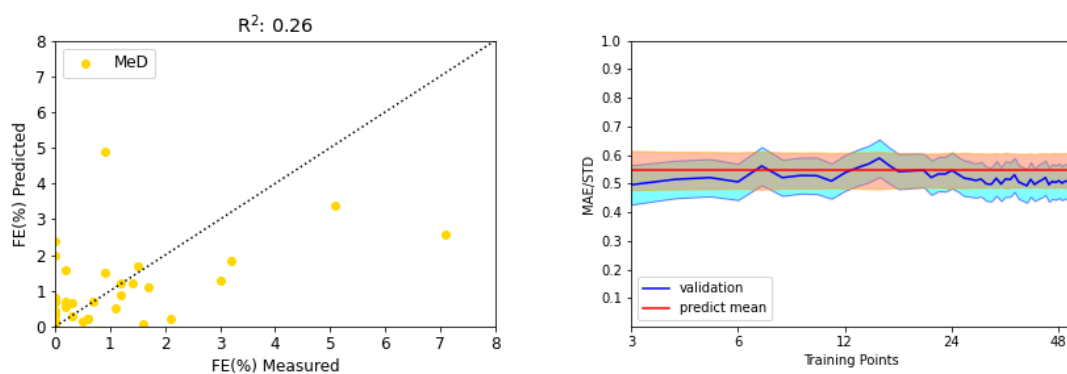

Figure S30: Left Panel: Parity plot between the predicted and measured FEs for MeD production during  $\text{CO}_2$  electroreduction on Cu single crystals with diverse terminations and at a number of applied voltages. Right Panel: MAE/STD (blue line) found for ML models prediction MeD production during  $\text{CO}_2\text{RR}$  as a function of the number of their training points. For reference, the orange line shows the MAE/STD incurred by a model which predicts the mean FE among the data in the full database regardless of the surface topology and the applied potential.

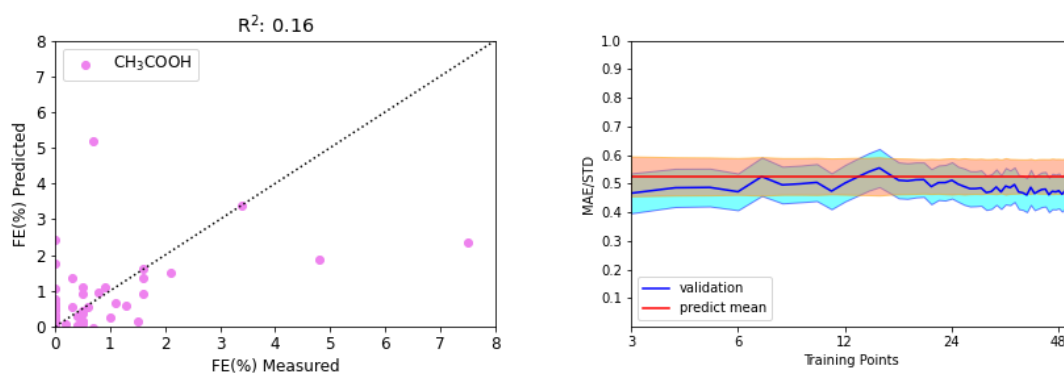

Figure S31: Left Panel: Parity plot between the predicted and measured FEs for CH<sub>3</sub>COOH production during CO<sub>2</sub> electroreduction on Cu single crystals with diverse terminations and at a number of applied voltages. Right Panel: MAE/STD (blue line) found for ML models prediction CH<sub>3</sub>COOH production during CO<sub>2</sub>RR as a function of the number of their training points. For reference, the orange line shows the MAE/STD incurred by a model which predicts the mean FE among the data in the full database regardless of the surface topology and the applied potential.

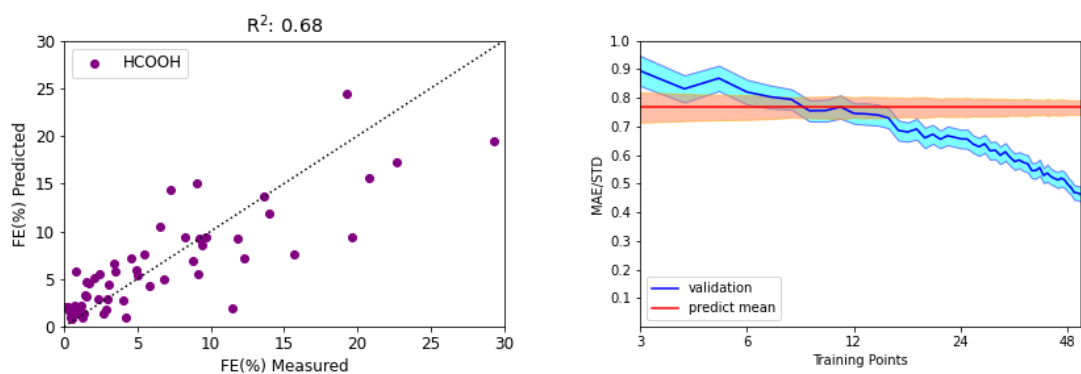

Figure S32: Left Panel: Parity plot between the predicted and measured FEs for HCOOH production during CO<sub>2</sub> electroreduction on Cu single crystals with diverse terminations and at a number of applied voltages. Right Panel: MAE/STD (blue line) found for ML models prediction HCOOH production during CO<sub>2</sub>RR as a function of the number of their training points. For reference, the orange line shows the MAE/STD incurred by a model which predicts the mean FE among the data in the full database regardless of the surface topology and the applied potential.

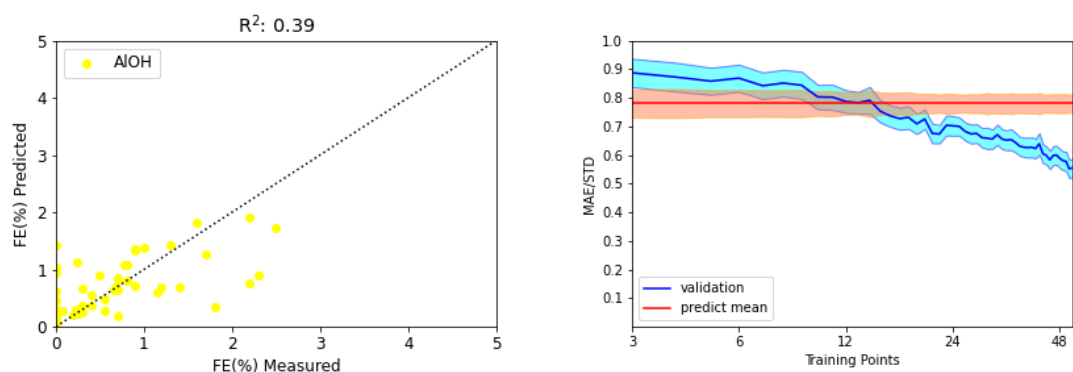

Figure S33: Left Panel: Parity plot between the predicted and measured FEs for AIOH production during  $\text{CO}_2$  electroreduction on Cu single crystals with diverse terminations and at a number of applied voltages. Right Panel: MAE/STD (blue line) found for ML models prediction AIOH production during  $\text{CO}_2\text{RR}$  as a function of the number of their training points. For reference, the orange line shows the MAE/STD incurred by a model which predicts the mean FE among the data in the full database regardless of the surface topology and the applied potential.

## 5 Data recalibration

Learning curves for this case study are built under the constrain that at least 2 training data from each of the Hori2003,Huang2018, and Hahn2017 report are always included in the training set.

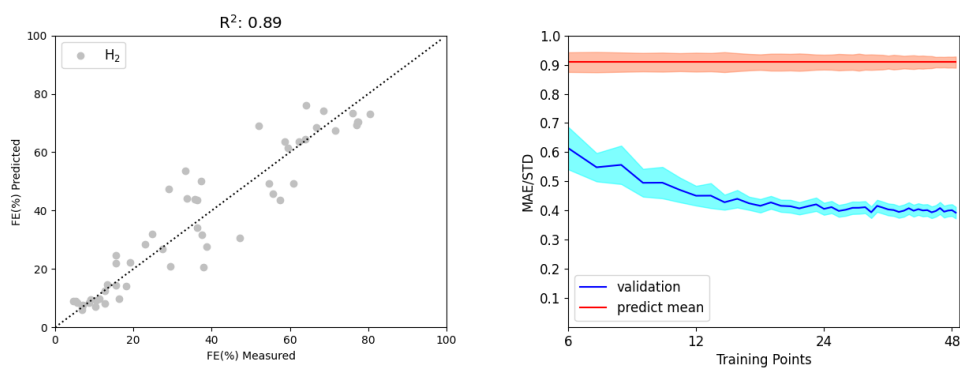

Figure S34: Left Panel: Parity plot between the predicted and measured FEs for H<sub>2</sub> production during CO<sub>2</sub> electroreduction on Cu single crystals with diverse terminations and at a number of applied voltages. Right Panel: MAE/STD (blue line) found for ML models prediction H<sub>2</sub> production during CO<sub>2</sub>RR as a function of the number of their training points. For reference, the orange line shows the MAE/STD incurred by a model which predicts the mean FE among the data in the full database regardless of the surface topology and the applied potential.

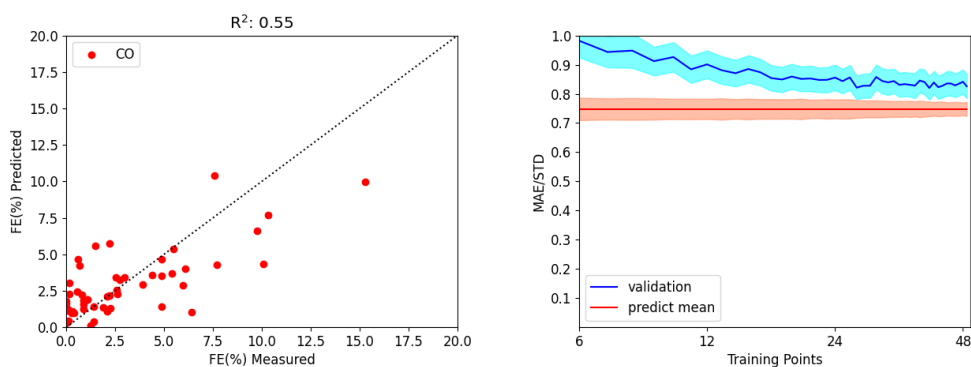

Figure S35: Left Panel: Parity plot between the predicted and measured FEs for CO production during CO<sub>2</sub> electroreduction on Cu single crystals with diverse terminations and at a number of applied voltages. Right Panel: MAE/STD (blue line) found for ML models prediction CO production during CO<sub>2</sub>RR as a function of the number of their training points. For reference, the orange line shows the MAE/STD incurred by a model which predicts the mean FE among the data in the full database regardless of the surface topology and the applied potential.

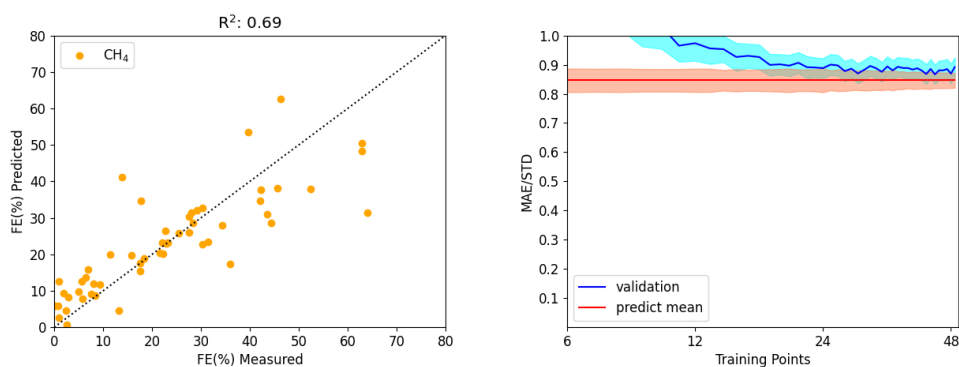

Figure S36: Left Panel: Parity plot between the predicted and measured FEs for CH<sub>4</sub> production during CO<sub>2</sub> electroreduction on Cu single crystals with diverse terminations and at a number of applied voltages. Right Panel: MAE/STD (blue line) found for ML models prediction CH<sub>4</sub> production during CO<sub>2</sub>RR as a function of the number of their training points. For reference, the orange line shows the MAE/STD incurred by a model which predicts the mean FE among the data in the full database regardless of the surface topology and the applied potential.

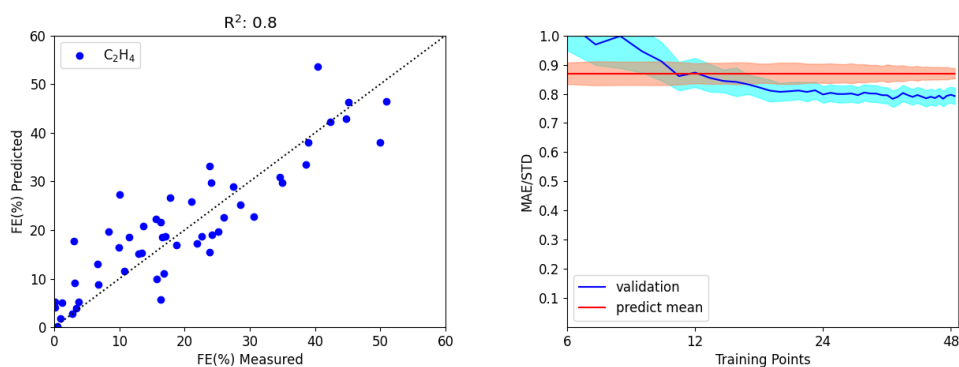

Figure S37: Left Panel: Parity plot between the predicted and measured FEs for C<sub>2</sub>H<sub>4</sub> production during CO<sub>2</sub> electroreduction on Cu single crystals with diverse terminations and at a number of applied voltages. Right Panel: MAE/STD (blue line) found for ML models prediction C<sub>2</sub>H<sub>4</sub> production during CO<sub>2</sub>RR as a function of the number of their training points. For reference, the orange line shows the MAE/STD incurred by a model which predicts the mean FE among the data in the full database regardless of the surface topology and the applied potential.



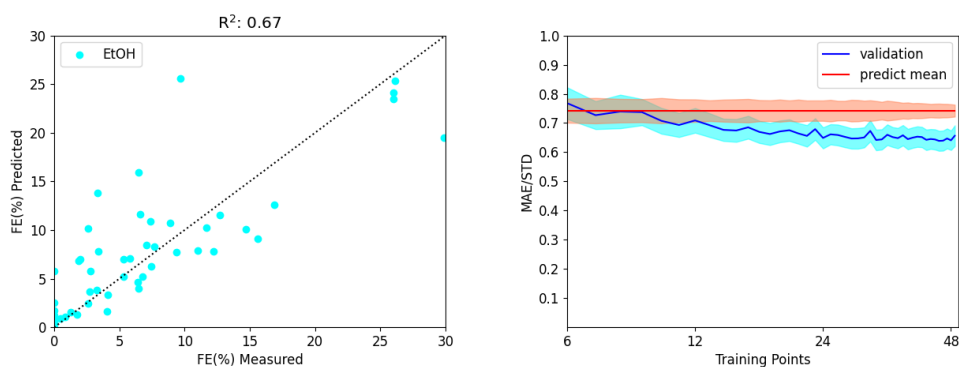

Figure S38: Left Panel: Parity plot between the predicted and measured FEs for EtOH production during CO<sub>2</sub> electroreduction on Cu single crystals with diverse terminations and at a number of applied voltages. Right Panel: MAE/STD (blue line) found for ML models prediction EtOH production during CO<sub>2</sub>RR as a function of the number of their training points. For reference, the orange line shows the MAE/STD incurred by a model which predicts the mean FE among the data in the full database regardless of the surface topology and the applied potential.

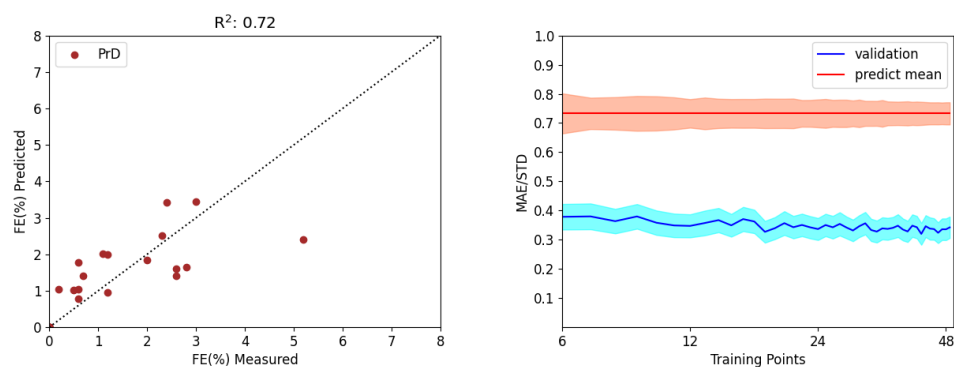

Figure S39: Left Panel: Parity plot between the predicted and measured FEs for PrD production during CO<sub>2</sub> electroreduction on Cu single crystals with diverse terminations and at a number of applied voltages. Right Panel: MAE/STD (blue line) found for ML models prediction PrD production during CO<sub>2</sub>RR as a function of the number of their training points. For reference, the orange line shows the MAE/STD incurred by a model which predicts the mean FE among the data in the full database regardless of the surface topology and the applied potential.

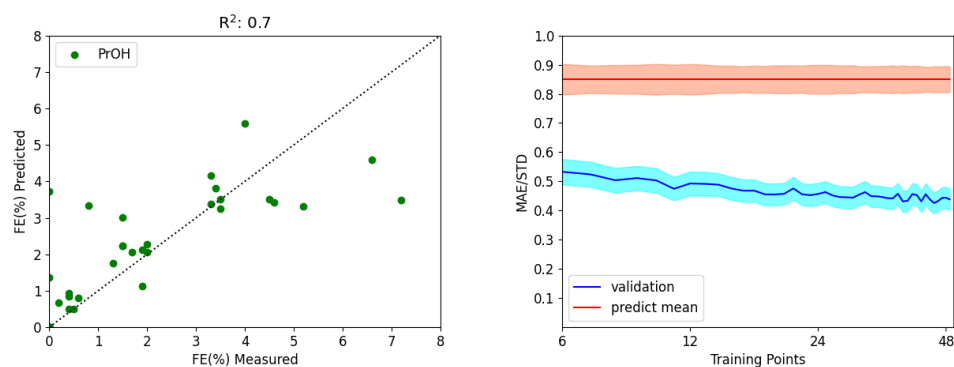

Figure S40: Left Panel: Parity plot between the predicted and measured FEs for PrOH production during CO<sub>2</sub> electroreduction on Cu single crystals with diverse terminations and at a number of applied voltages. Right Panel: MAE/STD (blue line) found for ML models prediction PrOH production during CO<sub>2</sub>RR as a function of the number of their training points. For reference, the orange line shows the MAE/STD incurred by a model which predicts the mean FE among the data in the full database regardless of the surface topology and the applied potential.

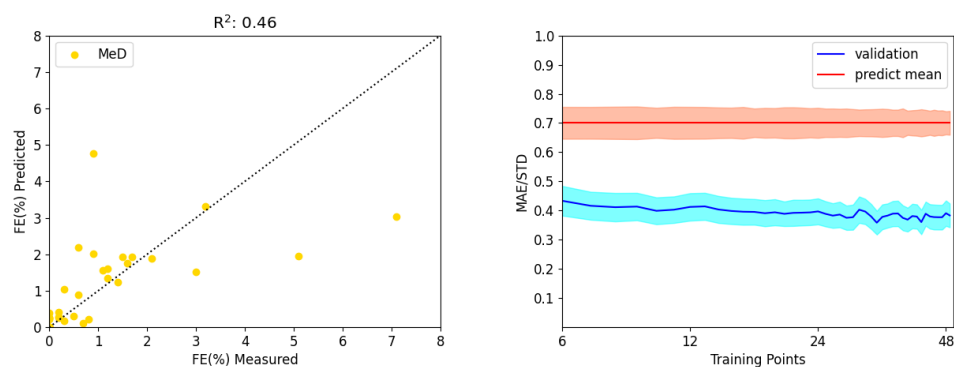

Figure S41: Left Panel: Parity plot between the predicted and measured FEs for MeD production during  $\text{CO}_2$  electroreduction on Cu single crystals with diverse terminations and at a number of applied voltages. Right Panel: MAE/STD (blue line) found for ML models prediction MeD production during  $\text{CO}_2\text{RR}$  as a function of the number of their training points. For reference, the orange line shows the MAE/STD incurred by a model which predicts the mean FE among the data in the full database regardless of the surface topology and the applied potential.

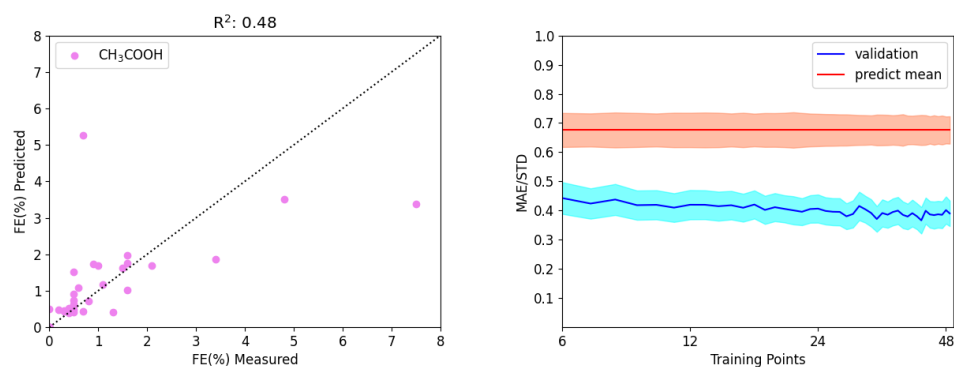

Figure S42: Left Panel: Parity plot between the predicted and measured FEs for CH<sub>3</sub>COOH production during CO<sub>2</sub> electroreduction on Cu single crystals with diverse terminations and at a number of applied voltages. Right Panel: MAE/STD (blue line) found for ML models prediction CH<sub>3</sub>COOH production during CO<sub>2</sub>RR as a function of the number of their training points. For reference, the orange line shows the MAE/STD incurred by a model which predicts the mean FE among the data in the full database regardless of the surface topology and the applied potential.

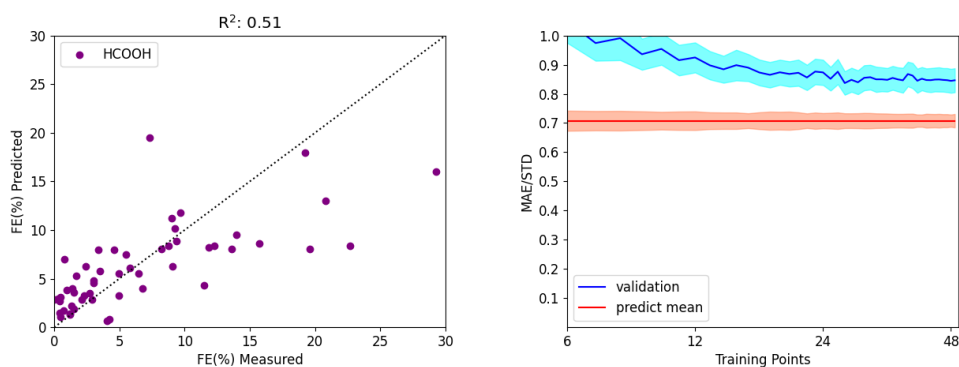

Figure S43: Left Panel: Parity plot between the predicted and measured FEs for HCOOH production during CO<sub>2</sub> electroreduction on Cu single crystals with diverse terminations and at a number of applied voltages. Right Panel: MAE/STD (blue line) found for ML models prediction HCOOH production during CO<sub>2</sub>RR as a function of the number of their training points. For reference, the orange line shows the MAE/STD incurred by a model which predicts the mean FE among the data in the full database regardless of the surface topology and the applied potential.

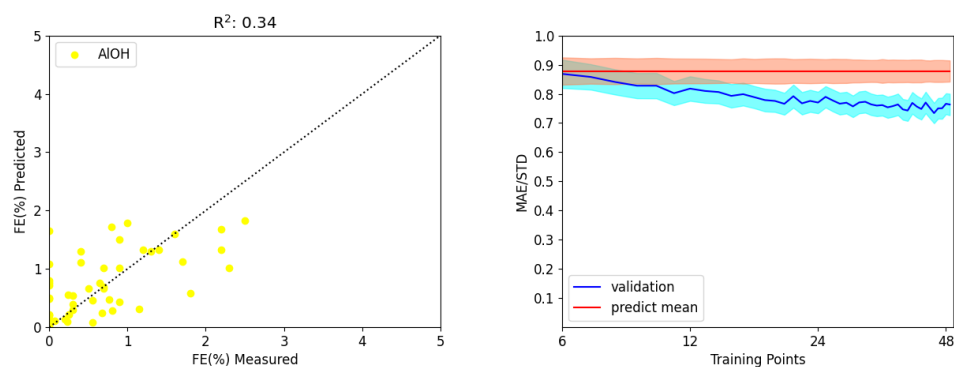

Figure S44: Left Panel: Parity plot between the predicted and measured FEs for AIOH production during  $\text{CO}_2$  electroreduction on Cu single crystals with diverse terminations and at a number of applied voltages. Right Panel: MAE/STD (blue line) found for ML models prediction AIOH production during  $\text{CO}_2\text{RR}$  as a function of the number of their training points. For reference, the orange line shows the MAE/STD incurred by a model which predicts the mean FE among the data in the full database regardless of the surface topology and the applied potential.

## 6 One-Hot Encoding

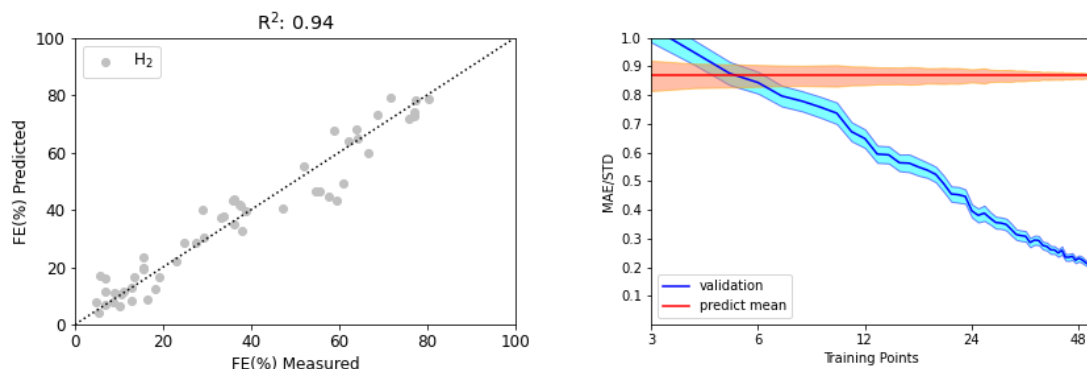

Figure S45: Left Panel: Parity plot between the predicted and measured FEs for H<sub>2</sub> production during CO<sub>2</sub> electroreduction on Cu single crystals with diverse terminations and at a number of applied voltages. Right Panel: MAE/STD (blue line) found for ML models prediction H<sub>2</sub> production during CO<sub>2</sub>RR as a function of the number of their training points. For reference, the orange line shows the MAE/STD incurred by a model which predicts the mean FE among the data in the full database regardless of the surface topology and the applied potential.



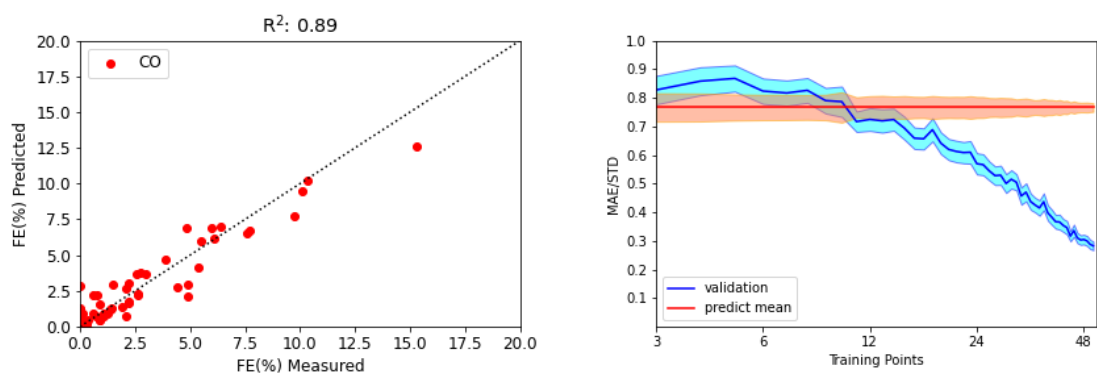

Figure S46: Left Panel: Parity plot between the predicted and measured FEs for CO production during CO<sub>2</sub> electroreduction on Cu single crystals with diverse terminations and at a number of applied voltages. Right Panel: MAE/STD (blue line) found for ML models prediction CO production during CO<sub>2</sub>RR as a function of the number of their training points. For reference, the orange line shows the MAE/STD incurred by a model which predicts the mean FE among the data in the full database regardless of the surface topology and the applied potential.

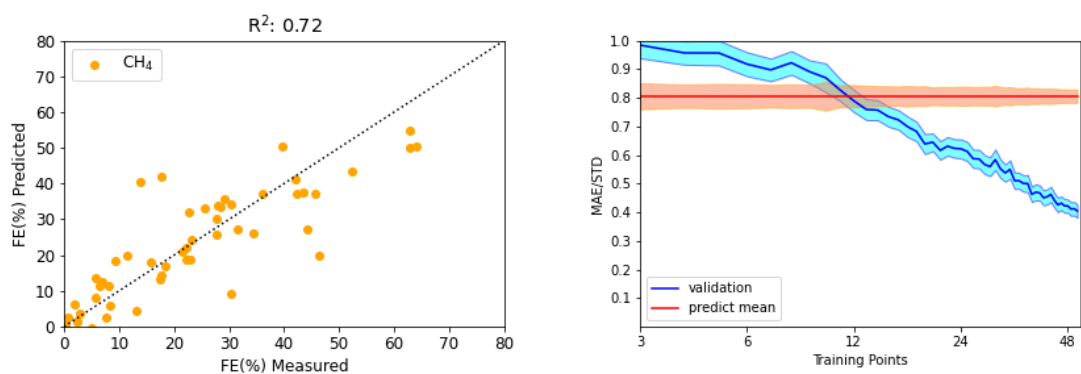

Figure S47: Left Panel: Parity plot between the predicted and measured FEs for CH<sub>4</sub> production during CO<sub>2</sub> electroreduction on Cu single crystals with diverse terminations and at a number of applied voltages. Right Panel: MAE/STD (blue line) found for ML models prediction CH<sub>4</sub> production during CO<sub>2</sub>RR as a function of the number of their training points. For reference, the orange line shows the MAE/STD incurred by a model which predicts the mean FE among the data in the full database regardless of the surface topology and the applied potential.

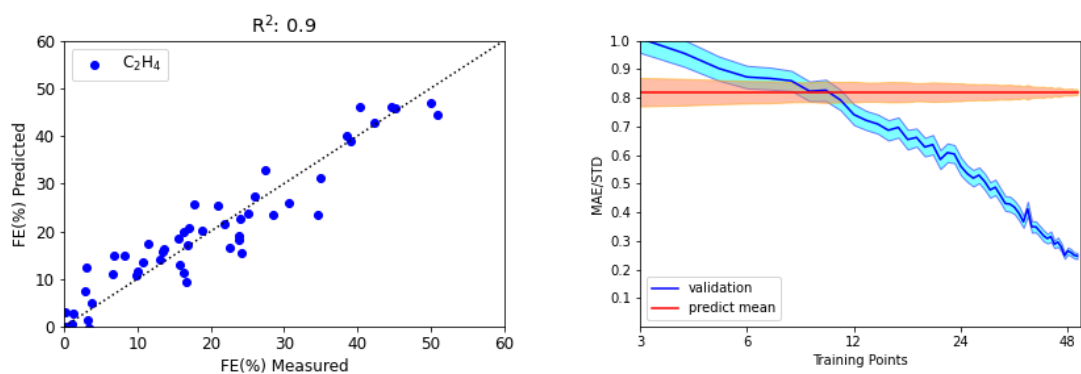

Figure S48: Left Panel: Parity plot between the predicted and measured FEs for  $C_2H_4$  production during  $CO_2$  electroreduction on Cu single crystals with diverse terminations and at a number of applied voltages. Right Panel: MAE/STD (blue line) found for ML models prediction  $C_2H_4$  production during  $CO_2$ RR as a function of the number of their training points. For reference, the orange line shows the MAE/STD incurred by a model which predicts the mean FE among the data in the full database regardless of the surface topology and the applied potential.

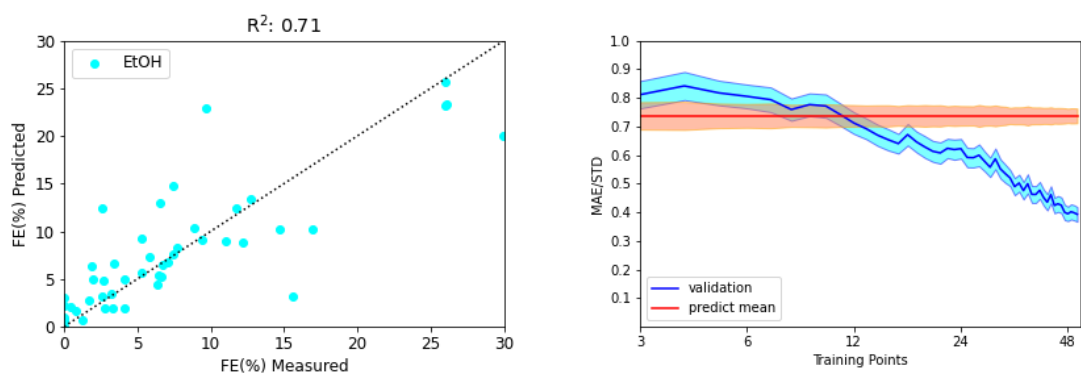

Figure S49: Left Panel: Parity plot between the predicted and measured FEs for EtOH production during CO<sub>2</sub> electroreduction on Cu single crystals with diverse terminations and at a number of applied voltages. Right Panel: MAE/STD (blue line) found for ML models prediction EtOH production during CO<sub>2</sub>RR as a function of the number of their training points. For reference, the orange line shows the MAE/STD incurred by a model which predicts the mean FE among the data in the full database regardless of the surface topology and the applied potential.

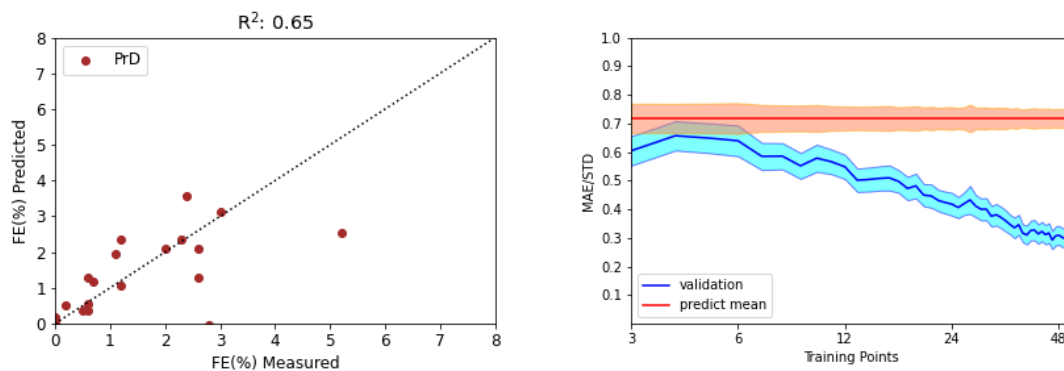

Figure S50: Left Panel: Parity plot between the predicted and measured FEs for PrD production during CO<sub>2</sub> electroreduction on Cu single crystals with diverse terminations and at a number of applied voltages. Right Panel: MAE/STD (blue line) found for ML models prediction PrD production during CO<sub>2</sub>RR as a function of the number of their training points. For reference, the orange line shows the MAE/STD incurred by a model which predicts the mean FE among the data in the full database regardless of the surface topology and the applied potential.

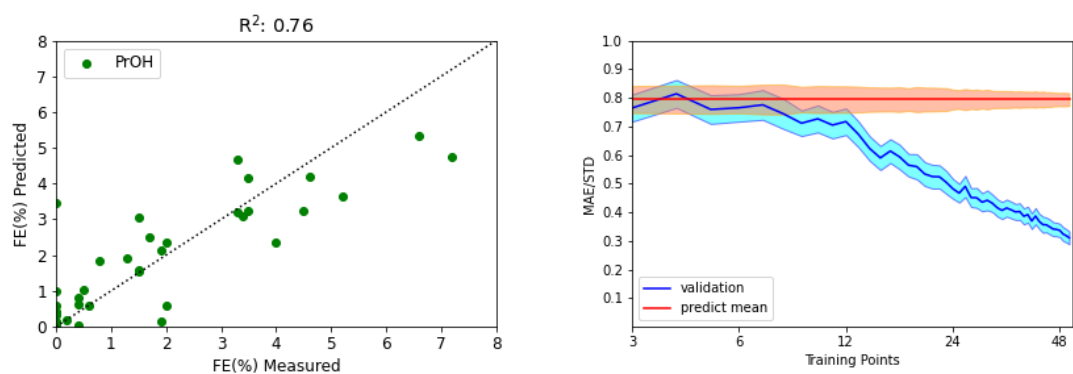

Figure S51: Left Panel: Parity plot between the predicted and measured FEs for PrOH production during CO<sub>2</sub> electroreduction on Cu single crystals with diverse terminations and at a number of applied voltages. Right Panel: MAE/STD (blue line) found for ML models prediction PrOH production during CO<sub>2</sub>RR as a function of the number of their training points. For reference, the orange line shows the MAE/STD incurred by a model which predicts the mean FE among the data in the full database regardless of the surface topology and the applied potential.

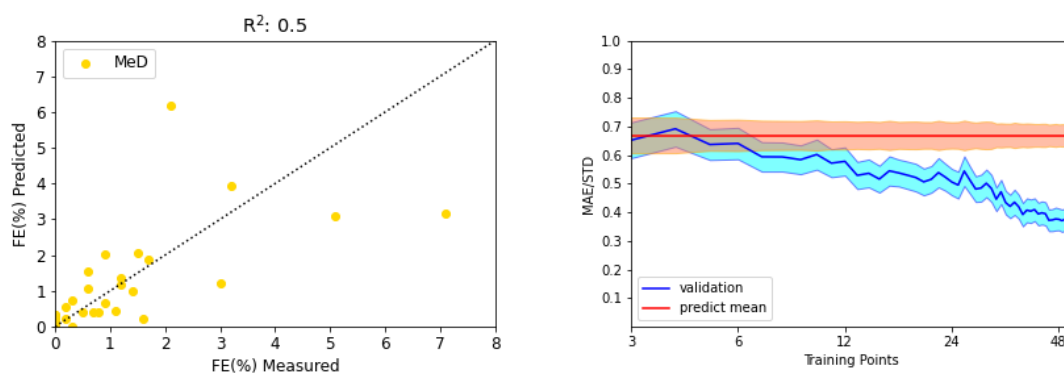

Figure S52: Left Panel: Parity plot between the predicted and measured FEs for MeD production during  $\text{CO}_2$  electroreduction on Cu single crystals with diverse terminations and at a number of applied voltages. Right Panel: MAE/STD (blue line) found for ML models prediction MeD production during  $\text{CO}_2\text{RR}$  as a function of the number of their training points. For reference, the orange line shows the MAE/STD incurred by a model which predicts the mean FE among the data in the full database regardless of the surface topology and the applied potential.

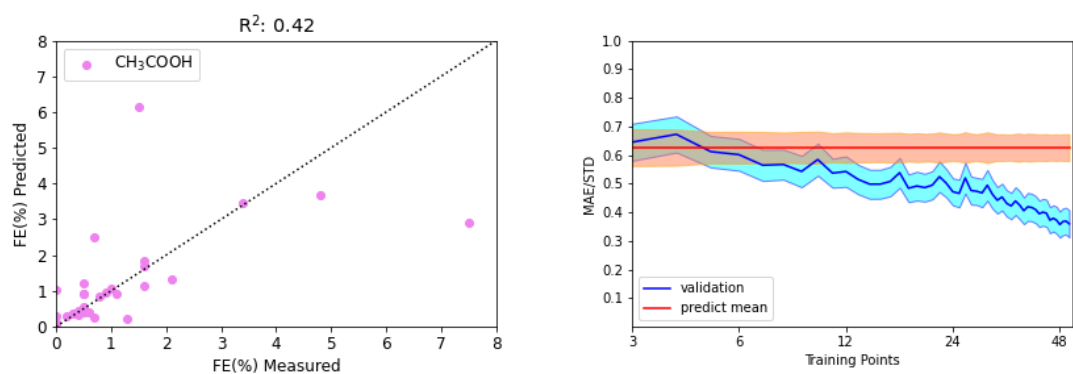

Figure S53: Left Panel: Parity plot between the predicted and measured FEs for CH<sub>3</sub>COOH production during CO<sub>2</sub> electroreduction on Cu single crystals with diverse terminations and at a number of applied voltages. Right Panel: MAE/STD (blue line) found for ML models prediction CH<sub>3</sub>COOH production during CO<sub>2</sub>RR as a function of the number of their training points. For reference, the orange line shows the MAE/STD incurred by a model which predicts the mean FE among the data in the full database regardless of the surface topology and the applied potential.



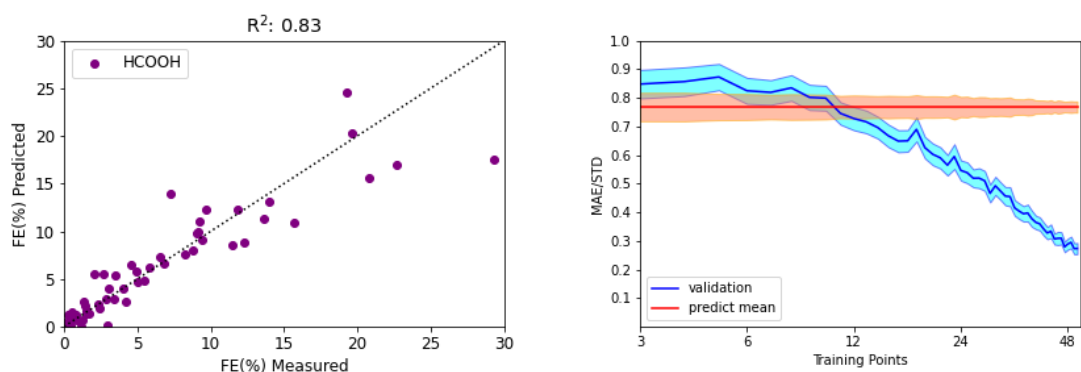

Figure S54: Left Panel: Parity plot between the predicted and measured FEs for HCOOH production during CO<sub>2</sub> electroreduction on Cu single crystals with diverse terminations and at a number of applied voltages. Right Panel: MAE/STD (blue line) found for ML models prediction HCOOH production during CO<sub>2</sub>RR as a function of the number of their training points. For reference, the orange line shows the MAE/STD incurred by a model which predicts the mean FE among the data in the full database regardless of the surface topology and the applied potential.

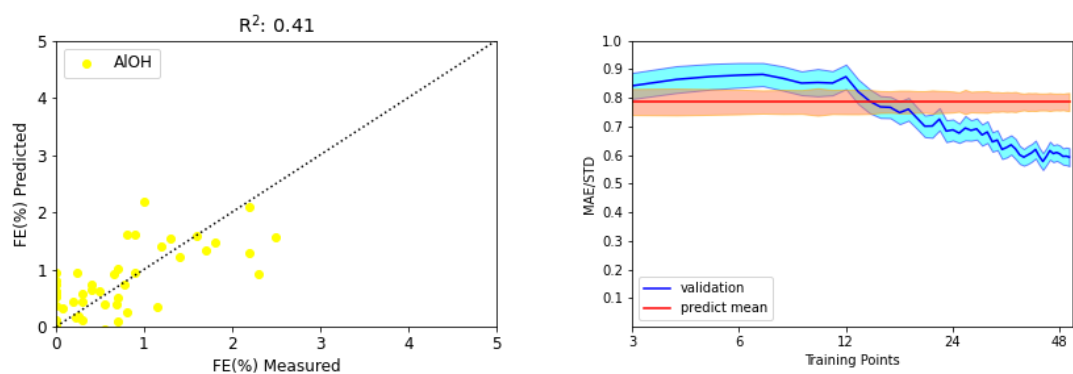

Figure S55: Left Panel: Parity plot between the predicted and measured FEs for AIOH production during  $\text{CO}_2$  electroreduction on Cu single crystals with diverse terminations and at a number of applied voltages. Right Panel: MAE/STD (blue line) found for ML models prediction AIOH production during  $\text{CO}_2\text{RR}$  as a function of the number of their training points. For reference, the orange line shows the MAE/STD incurred by a model which predicts the mean FE among the data in the full database regardless of the surface topology and the applied potential.

# References
